# Light induced synaptic vesicle autophagy

**Sheila Hoffmann<sup>1</sup>, Marta Orlando<sup>2,3</sup>, Ewa Andrzejak<sup>1</sup>, Thorsten Trimbuch<sup>2,3</sup>, Christian Rosenmund<sup>2,3</sup>, Frauke Ackermann<sup>1\*</sup> and Craig C. Garner<sup>1,2\*</sup>**

<sup>1</sup>German Center for Neurodegenerative Diseases (DZNE), Charitéplatz 1, 10117 Berlin, Germany

<sup>2</sup>Charité – Universitätsmedizin Berlin, Institute of Neurobiology, Charitéplatz 1, 10117 Berlin, Germany

<sup>3</sup>NeuroCure Cluster of Excellence, Charité – Universitätsmedizin Berlin, Charitéplatz 1, 10117 Berlin, Germany

\*co-corresponding, authors: frauke.ackermann@dzne.de, craig-curtis.garner@dzne.de

German Center for Neurodegenerative Diseases (DZNE), Charité Medical University, Charitéplatz 1, 10117 Berlin, Germany

**Key Words:** presynapse, autophagy, supernova, free radical, protein inactivation

**Running Title:** *Rapid induction of Presynaptic Autophagy*

**Number of pages:** 46

**Number of figures:** 10

**Number of words:** Abstract 213 words, Introduction 642 words, Discussion 1479 words

**Author contributions:** S. Hoffmann performed the majority of the experiments and analyzed data. S. Hoffmann, F. Ackermann, C. Rosenmund and C.C. Garner designed experiments. M. Orlando performed electron microscopy studies and E. Andrzejak performed electrophysiology experiments. Vectors were generated by S. Hoffmann and T. Trimbuch. S. Hoffmann, F. Ackermann and C.C. Garner wrote the manuscript.

The authors declare no competing financial interests.

**Acknowledgments:** We would like to thank Prof. Eckart D. Gundelfinger and Noam E. Ziv for discussion and valuable comments on the manuscript, Anny Kretschmer and Christine Bruns for technical assistance. The Virus Core Facility of the Charité - Universitätsmedizin Berlin for virus production. The work was supported by Deutsches Zentrum für Neurodegenerative Erkrankungen (DZNE), the Federal Government of Germany (DFG) SFB958 to CCG.

## 1 **Abstract**

2

3       The regulated turnover of synaptic vesicle (SV) proteins is thought to involve the ubiquitin  
4 dependent tagging and degradation through endo-lysosomal and autophagy pathways. Yet, it remains  
5 unclear which of these pathways are used, when they become activated and whether SVs are cleared  
6 en-mass together with SV proteins or whether both are degraded selectively. Equally puzzling is how  
7 quickly these systems can be activated and whether they function in real time to support synaptic  
8 health. To address these questions, we have developed an imaging based system that simultaneously  
9 tags presynaptic proteins while monitoring autophagy. Moreover, by tagging SV proteins with a light  
10 activated reactive oxygen species (ROS) generator, Supernova, it was possible to temporally control  
11 the damage to specific SV proteins and assess their consequence to autophagy mediated clearance  
12 mechanisms and synaptic function. Our results show that, in mouse hippocampal neurons, presynaptic  
13 autophagy can be induced in as little as 5-10 minutes and eliminates primarily the damaged protein  
14 rather than the SV en-mass. Importantly, we also find that autophagy is essential for synaptic function,  
15 as light-induced damage to e.g. Synaptophysin only compromises synaptic function when autophagy is  
16 simultaneously blocked. These data support the concept that presynaptic boutons have a robust highly  
17 regulated clearance system to maintain not only synapse integrity, but also synaptic function.

18

## 19 **Significance Statement**

20

21       The real-time surveillance and clearance of synaptic proteins is thought to be vital to the health,  
22 functionality and integrity of vertebrate synapses and is compromised in neurodegenerative  
23 disorders, yet the fundamental mechanisms regulating these systems remain enigmatic. Our analysis  
24 reveals that presynaptic autophagy is a critical part of a real-time clearance system at glutamatergic  
25 synapses capable of responding to local damage of synaptic vesicle proteins within minutes and to be  
26 critical for the ongoing functionality of these synapses. These data indicate that synapse autophagy is

27 not only locally regulated but also crucial for the health and functionality of vertebrate presynaptic  
28 boutons.  
29

## 30 **Introduction**

31

32 The integrity of vertebrate synapses requires robust cellular programs that monitor the activity  
33 states of thousands of proteins, eliminating those that are mis-folded or damaged. Failure of these  
34 programs can lead to the accumulation of non-functional proteins that reduce the efficiency of  
35 synaptic transmission and promote neurodegeneration (Liang and Sigrist, 2018; Vijayan and  
36 Verstreken, 2017; Waites et al., 2013). Neurons are endowed with several surveillance and clearance  
37 systems. These include an ubiquitin based tagging system that conjugates ubiquitin chains to damaged  
38 proteins, as well as several degradative systems that, for example, eliminate soluble proteins via the  
39 proteasome or integral membrane proteins and protein aggregates via the endo-lysosomal and/or  
40 autophagy systems (Wang et al., 2017).

41 Given their distance from the cell soma and high metabolic demand, synapses pose a significant  
42 challenge to neurons, as they have to maintain and ensure a stable functional pool of proteins  
43 (Tamminen et al., 2017). How might this be achieved? Emerging data indicate that synapses utilize  
44 their own local machinery to eliminate proteins e.g. in response to changes in synaptic activity or  
45 homeostatic plasticity (Vijayan and Verstreken, 2017). For example, the ESCRT system facilitates via  
46 Rab35 the elimination of subsets of SV proteins in response to changes in synaptic activity (Sheehan et  
47 al., 2016). Moreover, specific E3 ubiquitin ligases have been associated with the selective removal of  
48 key regulators of synaptic transmission such as RIM1 (Yao et al., 2007) and Munc13 by the  
49 proteasome (Jiang et al., 2010; Yi and Ehlers, 2005). Intriguingly, two active zone proteins, Piccolo and  
50 Bassoon, have also been identified as regulators of presynaptic proteostasis, as their inactivation leads  
51 to the loss of SVs and disintegration of synaptic junctions through the activation of E3 ligases (Waites  
52 et al., 2013) and autophagy (Okerlund et al., 2017).

53 Although these clearance systems are anticipated to ensure functionality of synaptic proteins, it  
54 remains unclear whether some are specialized for the removal of only subsets of synaptic proteins. A  
55 growing number of studies point to the importance of macroautophagy not only in maintaining  
56 mitochondrial health, but also the clearance of aggregated proteins (Vijayan and Verstreken, 2017).  
57 Interestingly, in Alzheimer's disease brains, an up-regulation of autophagy has been observed (Boland

58 et al., 2008; Lee et al., 2010; Nixon et al., 2005), however, in other diseases characterized by aggregate-  
59 prone proteins such as Parkinson's and Huntington's disease, autophagy is not engaged (Martinez-  
60 Vicente et al., 2010; Nixon, 2013; Rubinsztein et al., 2012; Spencer et al., 2009), which might  
61 contribute to the accumulation of protein aggregates and subsequent reduced neuronal survival  
62 (Ebrahimi-Fakhari et al., 2011; Nixon, 2013; Yue et al., 2009). This latter concept is supported by the  
63 analysis of Atg5 or Atg7 knockout mice, two essential autophagy-related proteins, which exhibit  
64 hallmarks of neurodegeneration (Hara et al., 2006; Komatsu et al., 2006). Defining the role of  
65 degradative systems during health and disease requires a better understanding of when and where  
66 each is turned on and which subsets of proteins they eliminate. For example, those critical for the real-  
67 time maintenance of synaptic function should be locally regulated and operating on a second to minute  
68 time scale, while those responding to chronic damage may act on longer time scales like hours. To  
69 address these fundamental questions, we have developed a strategy to selectively damage SV proteins  
70 within presynaptic boutons. This was accomplished by tethering the light activated free radical oxygen  
71 species (ROS) generator Supernova (Takemoto et al., 2013) to different SV proteins, allowing the local  
72 light induced damage of SV proteins with a half-radius of photo-damage as small as 3-4nm (Takemoto  
73 et al., 2013).

74 This manipulation was found to rapidly and selectively induce presynaptic autophagy within 5  
75 minutes and lead primarily to the elimination of damaged proteins and not SV proteins en-mass.  
76 Moreover, the selective damage of SV proteins allowed us to show that presynaptic autophagy is  
77 critical for the real-time maintenance of synaptic transmission.

78

79

80

## 81 **Material and Methods**

82

83 *Construction of vectors:* Monitoring of autophagy within presynaptic boutons was achieved by creating  
84 a set of lentiviral expression vectors. All vectors are based on the commercially available vector FUGW  
85 (Addgene). In order to co-express mCherry-tagged Synaptophysin (Syp) and eGFP-LC3,  
86 Synaptophysin-mCherry (Synaptophysin, NM\_012664.3) was synthesized by Eurofins Genomics with a  
87 downstream glycine linker that was fused to a self-cleaving 2A peptide (Kim et al., 2011). This element  
88 was then exchanged with GFP in the FUGW vector by ligation. Subsequently, the eGFP-LC3 (LC3,  
89 U05784.1) segment from FU-ptf-LC3 (Okerlund et al., 2017) was subcloned in frame after the P2A  
90 sequence, which resulted in the vector FU-Syp-mCherry-P2A-eGFP-LC3. This vector also served as a  
91 template for tagging Synaptophysin with Supernova. Here, Supernova was synthesized by Eurofins  
92 Genomics (Supernova, AB522905) (Takemoto et al., 2013) and exchanged for mCherry forming FU-  
93 Syp-Supernova-P2A-eGFP-LC3. To monitor endolysosomal systems PCR amplified Rab7  
94 (XM\_005632015.2) was exchanged with LC3 in FU-Syp-Supernova-P2A-eGFP-LC3 by Gibson assembly  
95 (Gibson et al., 2009) creating FU-Syp-Supernova-P2A-eGFP-Rab7. Lentiviral vectors expressing eGFP-  
96 LC3 and either Supernova tagged Synapsin (Syn) (NM\_019133) or Synaptotagmin (Syt)  
97 (NM\_001252341) (FU-Syn-Supernova-P2A-eGFP-LC3 and FU-Syt-Supernova-P2A-eGFP-LC3) were  
98 created by PCR amplification of Synapsin or Synaptotagmin from plasmid DNA (Chang et al., 2018;  
99 Waites et al., 2013) before being subjected to a Gibson assembly reaction with the purified Syp-deleted  
100 FU-Syp-Supernova-P2A-eGFP-LC3 vector. All final constructs were verified by both restriction digest  
101 and sequencing.

102

103 *HeLa cell culture and infection:* HeLa cells were maintained in DMEM complete medium (DMEM,  
104 10%FCS, 1%P/S) (Thermo Fisher Scientific, Waltham, USA). Medium was changed every 2 to 4 days.  
105 HeLa cells were routinely passaged at 80% confluence. Cells were washed with PBS and subsequently  
106 treated with 0.05% Trypsin-EDTA (Thermo Fisher Scientific, Waltham, USA) for 1 min at 37°C. Trypsin  
107 was inhibited using DMEM complete medium, afterwards cells were detached from the flask, counted  
108 and re-plated at a density of 30k per 1cm<sup>2</sup> onto glass coverslips. 24 hours after plating, HeLa cells were

109 infected with lentivirus adding 100 $\mu$ l per 6-well. 3 days after infection, DMEM was exchanged to EBSS  
110 medium (Thermo Fisher Scientific, Waltham, USA) containing 100 $\mu$ M chloroquine (Sigma-Aldrich, St.  
111 Louis, USA) for 2 hours at 37°C, in order to enhance the visualization of autophagy by blocking  
112 lysosomal degradation. Control cells were left untreated.

113

114 *Immunocytochemistry of HeLa cells:* Cells were fixed with 4% PFA in PBS for 4 min at RT and washed  
115 with PBS twice. All following steps were performed at RT. Cells were permeabilized by three washing  
116 steps with PBS + 0.2% Tween-20 (PBS-T) for a total of 30 min followed by incubation with PBS-T with  
117 5% normal goat serum (NGS) (=blocking solution) for another 30 min. The primary antibody was  
118 diluted in blocking solution and cells were incubated in this solution for 45 min. The following  
119 antibodies were used: primary antibodies against LC3 (1:500; rabbit; MBL International, Woburn,  
120 USA; Cat# PM036Y), p62 (1:200; mouse; BD, Heidelberg, Germany; Cat# 610833). Afterwards cells  
121 were washed three times in PBS-T for 10 min each. The secondary antibody, diluted in PBS-T 1:1000  
122 (Thermo Fisher Scientific, Waltham, USA), was put onto the cells for 60 min and washed away twice  
123 with PBS-T and once with PBS for 10 min each. Finally, coverslips were mounted using ProLong  
124 Diamond Antifade Mountant (Thermo Fisher Scientific, Waltham, USA).

125

126 *Preparation of cultured hippocampal neurons:* All procedures for experiments involving animals were  
127 approved by the animal welfare committee of Charité Medical University and the Berlin state  
128 government. For live cell imaging and immunocytochemistry, hippocampal neuron cultures were  
129 prepared on glass coverslips using the Banker protocol (Banker, 1988; Meberg and Miller, 2003) or on  
130  $\mu$ -Slide 8 Well culture dishes (ibidi GmbH, Martinsried, Germany). For the first, astrocytes from mouse  
131 WT cortices P0-2 were seeded on 6-well or 12-well plates at a density of 10k per 1cm<sup>2</sup> 5-7 d before  
132 neuron preparation. Then, hippocampi were dissected from WT mice P0-2 brains in cold Hanks' Salt  
133 Solution (Millipore, Darmstadt, Germany), followed by a 30 min incubation in enzyme solution (DMEM  
134 (Gibco, Thermo Fisher Scientific, Waltham, USA), 3.3mM Cystein, 2mM CaCl<sub>2</sub>, 1mM EDTA, 20U/ml  
135 Papain (Worthington, Lakewood, USA)) at 37°C. Papain reaction was inhibited by the incubation of  
136 hippocampi in inhibitor solution DMEM, 10% fetal calf serum (FCS) (Thermo Fisher Scientific,

137 Waltham, USA), 38mM BSA (Sigma-Aldrich, St. Louis, USA) and 95mM Trypsin Inhibitor (Sigma-  
138 Aldrich, St. Louis, USA) for 5 min. Afterwards, cells were triturated in NBA (Neurobasal-A Medium, 2%  
139 B27, 1% Glutamax, 0.2%P/S) (Thermo Fisher Scientific, Waltham, USA) by gentle pipetting up and  
140 down. Isolated cells were plated onto nitric acid washed and poly-l-lysine coated glass coverslips with  
141 paraffin dots at a density of 10k per 1cm<sup>2</sup>. After 1.5 hours the coverslips were put upside down onto  
142 the prepared astrocytes and co-cultured in NBA at 37°C, 5% CO<sub>2</sub>, for 13-15 d (days in vitro, DIV)  
143 before starting experiments. For the second, dissociated hippocampal neurons were plated directly  
144 onto  $\mu$ -Slide 8 Well Grid-500 ibiTreat culture dishes (ibidi GmbH, Martinsried, Germany) at a density  
145 of 25k per 1cm<sup>2</sup> and maintained in NBA at 37°C, 5% CO<sub>2</sub>, for 13-15 d before starting experiments.

146

147 *Lentivirus production:* All lentiviral particles were provided by the Viral Core Facility of the Charité -  
148 Universitätsmedizin Berlin ([vcf.charite.de](http://vcf.charite.de)) and were prepared as described previously. Briefly,  
149 HEK293T cells were cotransfected with 10 $\mu$ g of shuttle vector, 5 $\mu$ g of helper plasmid pCMVdr8.9, and  
150 5 $\mu$ g of pVSV.G with X-tremeGENE 9 DNA transfection reagent (Roche Diagnostics, Mannheim,  
151 Germany). Virus containing cell culture supernatant was collected after 72 hours and filtered for  
152 purification. Aliquots were flash-frozen in liquid nitrogen and stored at -80°C.

153

154 *Immunocytochemistry of hippocampal neurons:* Primary hippocampal neurons (expressing FU-Syp-  
155 mCherry-P2A-eGFP-LC3), 13-15 DIV, were treated with 2 $\mu$ M rapamycin (Sigma-Aldrich, St. Louis, USA)  
156 for either 10 min or 2h, or for the 10 min time point with 1 $\mu$ M wortmannin (InvivoGen, San Diego,  
157 USA) additionally. Untreated cells were used as a control. After treatment, cells were fixed with 4%  
158 PFA in PBS for 4 min and washed twice with PBS (10 min each). Afterwards, cells were permeabilized  
159 with PBS + 0.2% Tween-20 (PBS-T) three times for 10 min each. Following a 30 min incubation with  
160 5% normal goat serum (NGS) in PBS-T (=blocking solution), neurons were incubated with primary  
161 antibodies, diluted in blocking solution, for 45 min at RT. The following antibodies were used: primary  
162 antibody against p62 (1:500; rabbit; MBL International, Woburn, USA; Cat# PM045), Homer1 (1:1000;  
163 guinea pig; synaptic systems; Göttingen, Germany; Cat# 160004), Killerred (recognizes Supernova)  
164 (1:1000; rabbit; evrogen, Moscow, Russia; Cat# AB961), GFP (1:1000; chicken; Thermo scientific,



165 Waltham, USA; Cat# A10262), Bassoon (1:500; guinea pig; synaptic systems, Göttingen, Germany; Cat#  
166 141004), Synaptotagmin1 (1:1000; mouse; synaptic systems, Göttingen, Germany; Cat# 105011),  
167 Synaptophysin1 (1:1000; mouse; synaptic systems, Göttingen, Germany; Cat# 101011), Synapsin1  
168 (1:1000; rabbit; abcam, Cambridge, UK; Cat# ab64581), Chmp2b (1:200; rabbit; abcam, Cambridge,  
169 UK; Cat# ab33174). Afterwards cells were washed three times in PBS-T for 10 min each, incubated  
170 with the secondary antibody, diluted in PBS-T 1:1000 (Thermo Fisher Scientific, Waltham, USA), for 60  
171 min and washed twice with PBS-T and once with PBS for 10 min each. Finally, coverslips were dipped  
172 in H<sub>2</sub>O and mounted in ProLong Diamond Antifade Mountant (Thermo Fisher Scientific, Waltham,  
173 USA).

174

175 *Western Blot analyses:* Cultured hippocampal neurons, either infected with lentivirus at 2-3 DIV (TD)  
176 or uninfected (UT), were grown on 6-well-plates with a density of 20k per 1cm<sup>2</sup> until 13-15 DIV. All  
177 following steps were performed at 4°C. Neurons were kept on ice and washed twice with cold PBS.  
178 Subsequently, cells were detached by mechanical force. Isolated cells were centrifuged at 4000rpm for  
179 10 min and resuspended in 100µl lysis buffer (50mM Tris pH 7.9, 150mM NaCl, 5mM EDTA, 1% Triton  
180 X-100, 1% NP-40, 0.5% Deoxycholate, protease inhibitor cOmplete Tablets 1x) and incubated for 5  
181 min on ice. Afterwards, cell suspension was centrifuged at 13000rpm for 10 min after which the  
182 supernatant was transferred into a new tube. Subsequently, the protein concentration was determined  
183 using the Pierce BCA Protein Assay Kit (Thermo Fisher Scientific, Waltham, USA). The same amount of  
184 total protein was then separated by SDS-PAGE and transferred onto a PVDF membrane. Afterwards,  
185 the membrane was blocked in 5% milk in TBS-T (20mM Tris, 150mM NaCl, 0.1% Tween-20) for 1  
186 hour followed by primary antibody incubation (1:1000 in 3% milk in TBS-T) over night at 4°C. The  
187 following antibodies were used: primary antibody against mCherry (1:1000; rabbit; abcam,  
188 Cambridge, UK; Cat# ab167453). Afterwards, the membrane was washed three times with TBS-T for  
189 10 min each and incubated with the secondary antibody (1:2500 in 3% milk in TBS-T) for 1 hour at  
190 RT. HRP-conjugated secondary antibodies were diluted 1:25000 (Sigma-Aldrich, St. Louis, USA).  
191 Afterwards, the membrane was washed three times with TBS-T and bands were visualized using 20x  
192 LumiGLO Reagent and 20x Peroxidase (Cell Signaling, Danvers, USA).

193

194 *Photo-bleaching primary hippocampal neurons expressing Supernova-constructs:* Primary hippocampal  
195 neurons in  $\mu$ -Slide 8 Well Grid-500 ibiTreat (ibidi GmbH, Martinsried, Germany) culture dishes  
196 expressing Syp-Supernova, Syn-Supernova or Syt-Supernova cassettes were imaged at 13-15 DIV in  
197 Neurobasal Medium without phenol red (Thermo Fisher Scientific, Waltham, USA) at 37°C. Afterwards,  
198 a smaller diaphragm restricted area within the field of view was bleached for 60 seconds using 581nm  
199 wavelength light from a mercury lamp (100% HXP 120 V, 43 HE filter set 563/581). Immediately after  
200 bleaching, a second image was taken confirming the radius of the bleached area. Neurons were fixed at  
201 different time points (2-10 min, 56-64 min, 116-124 min) after bleaching Supernova and  
202 immunostained with antibodies against Supernova (using a Killerred antibody), GFP, Bassoon or  
203 Chmp2b (for procedure see immunocytochemistry of hippocampal neurons). For autophagy  
204 inhibition, 1 $\mu$ M wortmannin was added right before the bleaching and kept on the cells till they were  
205 fixed. To trigger the dispersion of Synapsin-Supernova before bleaching, fields of views were imaged,  
206 the medium was changed to tyrodes buffer 60mM KCl, followed by immediate bleaching for 60  
207 seconds. Subsequently, tyrodes buffer 60mM KCl was exchanged with Neurobasal medium without  
208 phenol red and images were taken. Afterwards, neurons were returned to a 37C incubator and fixed  
209 after 1 hour. After immunostaining, the same fields of view including the bleached areas were imaged  
210 utilizing the grid on the  $\mu$ -Slide 8 Well Grid-500 culture dishes.

211

212 *Basal autophagy in primary hippocampal neurons:* Primary hippocampal neurons in  $\mu$ -Slide 8 Well  
213 Grid-500 ibiTreat (ibidi GmbH, Martinsried, Germany) culture dishes expressing FU-eGFP-LC3 were  
214 left untreated and fixed at 13-15 DIV. Afterwards, neurons were immunostained with antibodies  
215 against GFP, Bassoon and Synaptophysin1/Synapsin1/Synaptotagmin1 (for procedure see  
216 immunocytochemistry of hippocampal neurons).

217

218 *FM dye uptake:* Primary hippocampal neurons, expressing FU-Syp-Supernova-P2A-eGFP-LC3 or FU-  
219 Syn-Supernova-P2A-eGFP-LC3, were used for live cell experiments. These were performed using a  
220 custom-built imaging chamber designed for liquid perfusion at 37°C. Cells were imaged in tyrodes

221 buffer pH 7.4 (119mM NaCl, 2.5mM KCl, 25mM HEPES, 2mM CaCl<sub>2</sub>, 2mM MgCl<sub>2</sub>, 30mM glucose) and  
222 stimulated for 90s in 90mM KCl buffer (31.5mM NaCl, 90mM KCl, 25mM HEPES, 2mM CaCl<sub>2</sub>, 2mM  
223 MgCl<sub>2</sub>, 30mM glucose) containing FM 1-43 dye (Thermo Fisher Scientific, Waltham, USA) at a final  
224 concentration of 1µg per ml. After stimulation, cells were washed with 20ml tyrodes buffer and  
225 subsequently imaged. To inhibit autophagy, 1µM wortmannin was added to neurons 1 min before light  
226 activation of Supernova and ~5 min before stimulation. Note, wortmannin was present in all solutions  
227 (90mM KCl FM dye, tyrodes buffer washing).

228

229 *Electron microscopy:* Cultured hippocampal neurons were plated on astrocytes on 6mm sapphire disks  
230 at a density of 20k per 1cm<sup>2</sup> and infected with FU-Syp-Supernova-P2A-eGFP-LC3 at 2-3 DIV. To better  
231 correlate regions of interest at the fluorescence and electron microscopy level, carbon was coated in  
232 the shape of an alphabetical grid on sapphire disks with the help of a metal mask (finder grid, Plano  
233 GmbH, Wetzlar, Germany). After a total of 13-15 days in culture, the sapphire disks were transferred  
234 into uncoated µ-Slide 8 Well to perform the bleaching experiment (for procedure see bleaching of  
235 primary hippocampal neurons expressing Supernova-constructs). Cryo-fixation using a high pressure  
236 freezing machine (EM-ICE, Leica, Wetzlar, Germany) was conducted at different time points after  
237 bleaching (10 min, 40 min) in Neurobasal medium without phenol red with the addition of a drop 10%  
238 Ficoll solution (Sigma-Aldrich, St. Louis, USA) to prevent ice crystal damage. After freezing, samples  
239 were cryo-substituted in anhydrous acetone containing 1% glutaraldehyde, 1% osmium tetroxide and  
240 1% milliQ water in an automated freeze-substitution device (AFS2, Leica). The temperature was kept  
241 for 4 hours at -90°C, brought to -20°C (5°C/h), kept for 12 hours at -20°C and then brought from -20°C  
242 to +20°C. Once at room temperature, samples were *en-bloc* stained in 0.1% uranyl acetate, infiltrated  
243 in increasing concentration of Epoxy resin (Epon 812, EMS Adhesives, Delaware, USA) in acetone and  
244 finally embedded in Epon for 48 hours at 65°C. Sapphire disks were removed from the cured resin  
245 block by thermal shock. At this point the alphabetical grid was visible on the resin block and was used  
246 to find back the bleached regions. The corresponding areas were excised from the blocks for ultrathin  
247 sectioning. For each sapphire, as a control, an additional resin blocks was excised from the quadrant  
248 opposite to the bleached area. 50nm thick sections were obtained using an Ultracut ultramicrotome

249 (UCT, Leica) equipped with a Ultra 45 diamond knife (Ultra 45, DiATOME, Hatfield, USA) and collected  
250 on formvar-coated 200-mesh copper grids (EMS). Sections were counterstained with uranyl acetate  
251 and lead citrate and imaged in a FEI Tecnai G20 Transmission Electron Microscope (FEI, Hillsboro,  
252 USA) operated at 80-200 keV and equipped with a Veleta 2K x 2K CCD camera (Olympus, Hamburg,  
253 Germany). Around 200 electron micrographs were collected (pixel size = 0.7nm) for each sample. Data  
254 were analyzed blindly using the ImageJ software. Double-membraned structures per presynaptic  
255 terminal were counted.

256

257 *Electrophysiology:* Whole cell patch-clamp recordings were performed on autaptic hippocampal  
258 neurons at 13–18 DIV. All recordings were obtained at ~25°C from neurons clamped at -70 mV with a  
259 Multiclamp 700B amplifier (Molecular Devices, Sunnyvale, USA) under the control of Clampex 10.4  
260 software (Molecular Devices). Data were sampled at 10kHz and low-pass Bessel filtered at 3kHz.  
261 Series resistance was compensated at 70% and cells whose series resistance changed more than 25%  
262 throughout the recording session were excluded from the analysis. Neurons were immersed in  
263 standard extracellular solution consisting of 140mM NaCl, 2.4mM KCl, 10mM HEPES, 10mM glucose,  
264 2mM CaCl<sub>2</sub> and 4mM MgCl<sub>2</sub>. The borosilicate glass electrodes (3-8 MΩ) were filled with the internal  
265 solution containing 136mM KCl, 17.8mM HEPES, 1mM EGTA, 0.6mM MgCl<sub>2</sub>, 4mM ATP-Mg, 0.3mM  
266 GTP-Na, 12mM phosphocreatine, and 50U/ml phosphocreatine kinase. All solutions were adjusted to  
267 pH 7.4 and osmolarity of ~300mOsm.

268 Coverslips with cultured neurons were placed on Olympus IX73 microscope (Olympus, Hamburg,  
269 Germany) with 20x phase contrast objective. For Supernova bleaching, illumination from a Mercury  
270 Vapor Short Arc lamp (X-Cite 120PC Q, Excelitas Technologies, Waltham, USA) was filtered through a  
271 560/40nm filter cube (Olympus U-FF mCherry) and controlled with a mechanical shutter. Lamp iris  
272 settings (100%) resulted in 71% bleaching of Supernova intensity (as compared to 22% of GFP  
273 bleaching), after 60 seconds of illumination.

274 From each neuron, 6 sweeps of EPSCs were evoked with a 2ms voltage step from -70mV to 0mV at  
275 0.2Hz. 60 seconds illumination started immediately after end of 6<sup>th</sup> sweep, and after 5 min of waiting  
276 second EPSC was recorded. Control condition without illumination included 6 min waiting period.

277 During recordings with wortmannin, 1 $\mu$ M wortmannin solution was applied onto the cell using a  
278 fast-flow system from the beginning of first EPSC until end of recording session. Electrophysiological  
279 data were analyzed offline using Axograph X (Axograph Scientific, Berkeley, USA), Excel (Microsoft,  
280 Redmond, USA) and Prism (GraphPad, La Jolla, USA).

281

282 *Image acquisition and quantification:* All images were acquired on a spinning disc confocal microscope  
283 (Zeiss Axio Observer.Z1 with Andor spinning disc and cobolt, omnicron, i-beam laser) (Zeiss,  
284 Oberkochen, Germany) using either a 40x or 63x 1.4 NA Plan-Apochromat oil objective and an iXon  
285 ultra (Andor, Belfast, UK) camera controlled by iQ software (Andor, Belfast, UK).

286 Images were processed using ImageJ and OpenView software (written by Dr. Noam Ziv, Technion  
287 Institute, Haifa, Israel). In brief with the OpenView software, multi-channel intensities were measured  
288 using a box routine associated with individual boutons. Boxes varied between 7x7 and 9x9 pixel in  
289 size, whereas settings were kept the same (e.g. thresholds). The average intensity (synaptic proteins,  
290 eGFP-LC3 et cetera) was calculated from all picked puncta and normalized to the control (untreated or  
291 unbleached).

292 For quantification of # of puncta separated axons were randomly picked and the number of  
293 puncta per unit length was counted manually. For Supernova experiments, axons were selected from  
294 live images showing no or little eGFP-LC3 staining. All Supernova evaluations were normalized to the  
295 unbleached control.

296 To determine the fraction of extrasynaptic eGFP-LC3 puncta positive for Syp-SN/Syn-SN/Syt-  
297 SN/Synaptophysin1/Synapsin1/Synaptotagmin1, multi-channel images were manually scanned for  
298 eGFP-LC3 puncta within the bleached area that were not colocalizing with Bassoon. Out of these  
299 extrasynaptic eGFP-LC3 puncta, the fraction of eGFP-LC3 puncta positive for a specific synaptic  
300 protein was quantified.

301 For FM dye uptake intensities, images of the Syp/Syn-Supernova signal taken before bleaching  
302 were used as a mask to define Syp/Syn-Supernova positive puncta. Afterwards, FM 1-43 intensity in  
303 Syp/Syn-Supernova positive puncta was quantified using OpenView.

304

305 *Experimental Design and Statistical Analyses:* Statistical design for all experiments can be found in the  
306 figure legends. Independent experiments equal independent cultures. All data representations and  
307 statistical analyses were performed with Graph-pad Prism.

308

309

## 310 **Results**

311

### 312 **Monitoring presynaptic autophagy.**

313 The primary goal of this study is to examine how and whether the local generation of ROS around  
314 SVs triggers a synaptic clearance response that removes damaged proteins. Based on previous studies  
315 showing that elevated ROS levels around organelles such as mitochondria leads to the activation of  
316 autophagy (Ashrafi et al., 2014; Wang et al., 2012; Yang and Yang, 2011), we anticipated that a similar  
317 generation of ROS around SVs may also induce a presynaptic autophagy based clearance program.  
318 Thus, while other clearance mechanisms, such as the endo-lysosomal or the proteasome system, could  
319 also be activated (see below), we initially sought to develop a live-cell imaging based system that could  
320 detect changes in presynaptic autophagy, following different insults.

321 To achieve this goal, we initially created a lentiviral vector (FU-Syp-mCh-P2A-eGFP-LC3) that co-  
322 expresses mCherry-tagged Synaptophysin (Syp-mCh), as a presynaptic marker, and eGFP-tagged LC3,  
323 to detect autophagic vacuoles (AVs) (Figure 1A). To allow the independent expression of Syp-mCh and  
324 eGFP-LC3, a P2A cleavage site was placed between the two coding sequences (Figure 1A). The vector  
325 was then tested in a number of different assays. First, it was lentivirally transduced into HeLa cells,  
326 where Syp-mCh and eGFP-LC3 both exhibited a largely diffuse cytoplasmic distribution (Figure 1B).  
327 The addition of 100 $\mu$ M chloroquine that impedes autophagic flux by blocking the fusion of lysosomes  
328 with autophagosomes (Galluzzi et al., 2016; Klionsky et al., 2012), resulted in a redistribution of eGFP-  
329 LC3 into a punctate pattern that colocalizes with endogenous LC3 and the autophagophore marker  
330 p62 (Johansen, 2011) (Figure 1B). However, Syp-mCh retained its diffuse cytosolic pattern and was  
331 not recruited into AVs (Figure 1B). These data indicate not only that the P2A site is efficiently cleaved,  
332 but also that the eGFP-LC3 portion of the vector reliably reports the formation of AVs as previously  
333 reported (Klionsky et al., 2012; Mizushima et al., 2010; Okerlund et al., 2017).

334 In a second set of experiments, we examined whether Syp-mCh faithfully labeled presynaptic  
335 sites. Here, dissociated cultures of hippocampal neurons were infected to 30% with our lentiviral  
336 vector (FU-Syp-mCherry-P2A-eGFP-LC3) at 2-3 days in vitro (DIV) and analyzed by immuno-  
337 cytochemistry at 13-15 DIV. Immuno-staining fixed cultures with antibodies to the postsynaptic

338 density (PSD) protein Homer1 revealed that Syp-mCh forms puncta along the cell somas and dendrites  
339 of un-infected cells that colocalize with Homer1 puncta (Figure 1D), consistent with the presynaptic  
340 localization of other XFP-tagged Synaptophysin as reported previously (Li et al., 2010). A comparison  
341 of Syp-mCh and eGFP-LC3 signals in primary hippocampal neurons during live cell imaging reveals  
342 that a small fraction (~10%) of the Syp-mCh positive puncta colocalizes with eGFP-LC3 positive  
343 puncta (Figure 1C). This minimal colocalization suggests that the P2A site is functioning properly to  
344 uncouple these two proteins. This concept is further supported by western blots of cellular lysates of  
345 infected hippocampal neurons stained with a mCherry antibody. Here, greater than 95% of the  
346 immuno-reactivity is present in the 70kDa Syp-mCh band versus the uncleaved 120kDa Syp-mCh-P2A-  
347 eGFP-LC3 band (Figure 1E), supporting the conclusion that once expressed in neurons each reporter is  
348 free to operate independently.

349 In a third set of experiments, we examined how the induction of autophagy with 2 $\mu$ M rapamycin  
350 (Boland et al., 2008; Hernandez et al., 2012; Spilman et al., 2010) affected the distribution of eGFP-LC3  
351 relative to Syp-mCh in neurons. Initially, rapamycin was added to sparsely FU-Syp-mCherry-P2A-  
352 eGFP-LC3 infected hippocampal cultures (13-15 DIV) for 2 hours, as most previously studies had  
353 shown that this condition can induce autophagy in neurons (Hernandez et al., 2012). To identify  
354 'synaptic' changes in eGFP-LC3 levels, we analyzed the average intensities of eGFP-LC3 puncta that  
355 colocalized with Syp-mCh puncta in fixed neurons. This revealed a modest (36%) but significant  
356 increase in eGFP-LC3 intensities within presynaptic boutons compared to untreated control neurons  
357 (Figure 1F and I). Monitoring the number of eGFP-LC3 puncta per unit length of axon revealed that 2  
358 hours of rapamycin treatment significantly increased the number of eGFP-LC3 puncta present in axons  
359 compared to non-treated control neurons (Figure 1F and J). These data are consistent with the concept  
360 that rapamycin can induce the formation of autophagosomes/AVs in hippocampal axons. However,  
361 given that vesicular transport is quite rapid, it is unclear whether during the 2 hour period the newly  
362 formed AVs arose at synapses and dispersed into the axons and/or were generated within axons and  
363 then accumulate within presynaptic boutons. We thus explored whether AVs would appear in as little  
364 as 10 minutes following the addition of rapamycin. Surprisingly, we found that not only did eGFP-LC3  
365 puncta appear in axons during this short period of induction (Figure 1G and L), but eGFP-LC3 intensity



366 was dramatically increased within presynaptic boutons marked with Syp-mCh (Figure 1G and K).  
367 Importantly, we also found that appearing eGFP-LC3 puncta were positive for the autophagy cargo  
368 receptor p62 (Johansen, 2011) (Figure 1H and M), suggesting that they are indeed autophagosomes  
369 and are forming locally within presynaptic boutons. To further explore whether the observed  
370 rapamycin induced AV formation at synapses is induced via the conventional autophagy pathway,  
371 which includes the PI3K Vps34 (Lilienbaum, 2013; Rubinsztein et al., 2012), we included 1 $\mu$ M  
372 wortmannin, a PI3K inhibitor (Carpenter and Cantley, 1996; Klionsky et al., 2012), together with  
373 rapamycin during the 10 minutes incubation period. This manipulation abolished the accumulation of  
374 eGFP-LC3 puncta in both presynaptic boutons (marked with Syp-mCh) (Figure 1N and O) and along  
375 axons (Figure 1N and P). Taken together these data indicate that the machinery necessary for the  
376 rapid generation of AVs is located within or very near to presynaptic boutons and can be triggered by  
377 a PI3K-dependent pathway.

378

### 379 **Light-induced ROS generation triggers presynaptic autophagy.**

380 The ability of rapamycin to induce presynaptic autophagy within 10 minutes strongly suggests  
381 that presynaptic boutons contain local clearance mechanisms, such as autophagy, that could in  
382 principle deal with locally damaged proteins in real-time. As a direct test of this hypothesis, we  
383 explored whether the real-time damage of SV proteins via the production of reactive oxygen species  
384 (ROS) (Takemoto et al., 2013) could also trigger the rapid clearance of these molecules via, e.g.  
385 autophagy. To accomplish this goal, we made use of a molecular variant of GFP called Supernova, a  
386 monomeric version of KillerRed (Bulina et al., 2006), previously shown to generate ROS following its  
387 excitation with 550-590nm light (Takemoto et al., 2013). As other photosensitizers, short-lived ROS  
388 generated by Supernova is expected to damage proteins within 1-4nm of the source (Linden et al.,  
389 1992; Takemoto et al., 2013). Thus to restrict the actions of the ROS to SVs, we initially fused  
390 Supernova to the short cytoplasmic tail of the SV protein Synaptophysin (creating Synaptophysin-  
391 Supernova; Syp-SN). This was then subcloned and co-expressed with eGFP-LC3 via our lentiviral  
392 vector (FU-Syp-Supernova-P2A-eGFP-LC3) (Figure 2A) (see also Figure 6A).

393 As with the FU-Syp-mCherry-P2A-eGFP-LC3 vector, we then verified that both the Syp-SN and  
394 eGFP-LC3 portions of the vector were expressed and processed. We also verified that the eGFP-LC3  
395 segment was recruited to p62 positive AVs in HeLa cells treated with chloroquine and that Syp-SN  
396 properly localized at Homer1 positive synapses as Syp-mCh (data not shown). Moreover, we  
397 confirmed in HeLa cells that 80% of the Supernova fluorescence could be photobleached during a 60  
398 seconds exposure of 581nm wavelength light from a mercury lamp, and verified that ROS was being  
399 generated with the superoxide indicator Dihydroethidium (DHE), as previously shown (Takemoto et  
400 al., 2013).

401 To explore whether a local increase in ROS production near SVs can induce presynaptic  
402 autophagy, primary hippocampal neurons grown on  $\mu$ -Slide 8 Well culture dishes were sparsely  
403 infected with FU-Syp-Supernova-P2A-eGFP-LC3 at 2-3 DIV. Around 14 DIV, they were transferred to a  
404 spinning disc confocal microscope equipped with a temperature controlled live-cell imaging chamber.  
405 Prior to bleaching selected fields of view, axons from infected neurons growing on top of uninfected  
406 neurons were selected and imaged during excitation with a 491nm (for the eGFP-LC3 signal) and a  
407 561nm laser (for the Syp-SN signal). Subsequently, a subregion, selected with a field diaphragm, was  
408 bleached by exposing cells to 581nm light from a mercury lamp for 60 seconds (Figure 2B), a  
409 condition found to bleach approximately 80% of the initial fluorescence. Cultures were fixed 5-120  
410 minutes post bleaching and immuno-stained with antibodies against GFP and Supernova, allowing the  
411 post-hoc identification of synapses within and outside of the bleached area and the levels and  
412 redistribution of eGFP-LC3. Comparing the intensity of eGFP-LC3 at Syp-SN positive puncta within and  
413 outside the bleached area revealed a significant increase in synaptic eGFP-LC3 intensity in the  
414 bleached area within 5 minutes of initial bleaching (Figure 2C and F). However, at that time point, the  
415 number of eGFP-LC3 puncta per axon unit length is not changed compared to the unbleached control  
416 (Figure 2C and G). Similarly, 1 hour after bleaching, eGFP-LC3 levels are still elevated in Syp-SN  
417 positive synapses inside the bleached area compared to outside, with only a modest increase in the  
418 number of eGFP-LC3 puncta per unit length of axon (Figure 2D, H and I). Intriguingly, 2 hours after  
419 triggering ROS production, eGFP-LC3 levels remain somewhat elevated at Syp-SN positive synapses,  
420 and dramatically accumulated as small puncta along axons inside the bleached area (Figure 2E, J and

421 K) compared to those outside. These latter data imply that the synaptic increase in ROS rapidly  
422 induces presynaptic autophagy and that subsequent flux carries the autophagosomal membranes into  
423 axons.

424 To investigate whether the observed ROS-induced increase in eGFP-LC3 puncta is dependent on  
425 the conventional PI3K/Vps34 autophagy pathway, 1 $\mu$ M wortmannin was added to neurons before  
426 bleaching SN and maintained in the culture for the following 2 hours, after which neurons were fixed  
427 and analyzed. In cells that were not treated with wortmannin, eGFP-LC3 intensity within presynaptic  
428 boutons as well as the number of eGFP-LC3 puncta per unit length of axon remained elevated (Figure  
429 4A, C and D) compared to the unbleached control. In contrast, the inclusion of wortmannin was found  
430 to inhibit the light-induced increase in eGFP-LC3 intensity within presynaptic boutons (Figure 3B and  
431 E), but had no effect on the number of eGFP-LC3 puncta per unit length of axon (Figure 3B and F).  
432 These data indicate that the ROS-induced increase in presynaptic autophagy may be dependent on the  
433 PI3K signaling pathway, while autophagy within axons is not. Note that while most of the Syp-SN is  
434 synaptic (data not shown), extrasynaptic pools are likely present, presumably engaged in the active  
435 transport within mobile pools of SVs (Cohen et al., 2013; Maas et al., 2012; Tsurriel et al., 2006).  
436 Photobleached damage of this pool could thus contribute to a PI3K-independent form of axonal  
437 autophagy in axons, as already described for other cell types (Chu et al., 2007; Lemasters, 2014; Zhu et  
438 al., 2007).

439

#### 440 **ROS induced damage to Synaptophysin promotes AV formation.**

441 The appearance of eGFP-LC3 positive puncta within the axons and presynaptic boutons of  
442 Synaptophysin-Supernova expressing cells following photobleaching suggests that this insult induces  
443 the autophagic clearance of damaged SVs and their proteins. To formally test this hypothesis, we  
444 performed transmission electron microscopy of FU-Syp-Supernova-P2A-eGFP-LC3 infected  
445 hippocampal neurons. Infected neurons grown on sapphire disks were photobleached with 581nm  
446 light from a mercury lamp for 60 seconds. Similar to our live imaging experiments, a field diaphragm  
447 was used to create bleached and unbleached regions on the same sapphire disk before high pressure  
448 freezing and further processing for EM. The number of double-membraned organelles (autophagic

449 vacuoles = AVs) within presynaptic boutons or SVs containing axonal varicosities were then quantified  
450 as performed previously (Okerlund et al., 2017). Consistent with light level studies (Figure 2F),  
451 significantly more AVs per presynaptic terminal were observed 10 minutes after light-induced  
452 Synaptophysin damage within the bleached area compared to the unbleached area (Figure 4C and D).  
453 Images analyzed ~40 minutes after bleaching revealed a slight but non-significant increase in  
454 AVs/terminal (Figure 4F and G). These data indicate that most newly formed autophagosomes quickly  
455 leave the synapse.

456 Conceptually, local ROS induced damage of synaptic proteins could induce not only autophagy but  
457 also other degradative pathways such as the endo-lysosomal system. One hallmark of the endo-  
458 lysosomal system is the appearance of multivesicular bodies (MVBs) (Ceccarelli et al., 1973; Raiborg  
459 and Stenmark, 2009). We thus examined whether the light-induced damage of Synaptophysin also  
460 induces the endo-lysosomal pathway by quantifying the presence of synaptic MVBs within  
461 photobleached presynaptic boutons by EM. Intriguingly, no change in their number was observed  
462 either 10 or 40 minutes after photobleaching compared to unbleached boutons (Figure 4E and H),  
463 indicating that the ROS mediated damage of Synaptophysin primarily triggers the activation of  
464 autophagy. To confirm this observation, we also monitored whether markers of the endo-lysosomal  
465 pathway accumulated in presynaptic boutons following light-induced damage of Synaptophysin.  
466 Strikingly, level of the late endosome marker Rab7 are increased at presynaptic boutons 5 minutes  
467 after bleaching (Figure 5B and E), and stay elevated compared to the unbleached control for at least 2  
468 more hours (Figure 5E, G and I). Since Rab7 is also abundant on autophagosomes, we stained for  
469 another, more specific, MVB marker Chmp2b, which is part of the ESCRT-III complex (Vingtdeux et al.,  
470 2012). Interestingly, Chmp2b also accumulates at boutons 1 hour after bleaching (Figure 5 C and H).  
471 These observations indicate that ROS mediated damage to Synaptophysin/SVs may also engage other  
472 degradative pathways such as the endo-lysosomal system.

473

#### 474 **Induction of presynaptic autophagy requires the association of Supernova with SVs.**

475 As ROS generated by illuminating Supernova is anticipated to damage proteins only within 1-4nm  
476 of the sources (Jacobson et al., 2008; Takemoto et al., 2013), it seems reasonable to predict that the

477 induction of presynaptic autophagy is linked to the damage of proteins physically associated with SVs,  
478 which are then sorted and gathered into the interior of the newly forming autophagophore membrane.  
479 If true, the degree of induction would be related to the physical association of proteins with SVs  
480 (Figure 6A).

481 To test this hypothesis, we coupled Supernova to two additional SV proteins, Synaptotagmin  
482 (Syt), an integral membrane protein with a long cytoplasmic tail (Chapman, 2002; Hilfiker et al., 1999),  
483 and Synapsin (Syn), a larger cytosolic protein (Figure 6A) that dynamically associates with the outer  
484 surface of SVs in an activity dependent manner (Chi et al., 2001; Waites and Garner, 2011), potentially  
485 allowing for a more attenuated ROS mediated damage to SVs. To permit the simultaneous detection of  
486 presynaptic autophagy, we co-expressed Syt-SN or Syn-SN with eGFP-LC3 via our lentiviral vector (FU-  
487 Syt-SN-P2A-eGFP-LC3; FU-Syn-SN-P2A-eGFP-LC3). In control experiments, we confirmed that both  
488 Syt-SN and Syn-SN and eGFP-LC3 were appropriately processed and that Syt-SN and Syn-SN retained  
489 their ability to become selectively localized to presynaptic boutons (data not shown). As described  
490 above for Syp-SN, neurons infected at 2-3 DIV were photobleached at 13-15 DIV for 60 seconds and  
491 the intensity of eGFP-LC3 within presynaptic boutons quantified. Interestingly, eGFP-LC3 intensity in  
492 Syt-SN and Syn-SN puncta as well as the number of eGFP-LC3 puncta along axons did not change  
493 within 5 minutes of photobleaching (Figure 6B, E, H and K) compared to unbleached boutons.  
494 However, 1 hour after light-induced damage to either Synaptotagmin or Synapsin, eGFP-LC3 intensity  
495 significantly increased within presynaptic boutons immuno-positive for Syt-SN (Figure 6C and F) and  
496 Syn-SN (Figure 6I and L). When fixed 2 hours after ROS production, eGFP-LC3 levels remained slightly  
497 elevated at bleached Syn-SN positive synapses (Figure 6J and M), but returned to unbleached levels in  
498 Syt-SN positive synapse (Figure 6D and G). Taken together, these data indicate that, as Synaptophysin,  
499 the local ROS mediated damage to the Synaptotagmin and the SV-associated protein Synapsin can  
500 induce presynaptic autophagy, albeit at attenuated slower rates.

501 Intriguingly previous studies have shown that only about 50% of Synapsin within boutons is  
502 physically associated with SVs, while the remainder is soluble (Benfenati et al., 1993; Chi et al., 2001;  
503 Leal-Ortiz et al., 2008). Given that autophagy directed cargos are primarily membrane bound, we  
504 posited that it is the SV bound form of Synapsin-SN that triggers presynaptic autophagy. To test this

505 hypothesis, we took advantage of the activity dependent regulation of Synapsin to trigger its  
506 dissociation from SVs and dispersion out of the synapse, using a high KCl (60mM) stimulation (Chi et  
507 al., 2001). Remarkably, when photobleaching was performed during a high KCl stimulus, eGFP-LC3  
508 levels did not increase 1 hour after ROS production at synapses over-expressing Syn-SN compared to  
509 unstimulated control (Figure 7B and E). There was also no increase in the number of eGFP-LC3 puncta  
510 per axon unit length detectable (Figure 7B and F). These data indicate that the induction of  
511 presynaptic autophagy is tightly coupled to ROS damage of SV proteins, and thus associated with the  
512 normal clearance of mis-folded or damaged SV proteins.

513

514 **Supernova-tagged proteins are more abundant in ROS-induced autophagy organelles than**  
515 **endogenous SV proteins.**

516 To date several studies have demonstrated that autophagosomes form in axons upon starvation,  
517 rapamycin treatment as well as enhanced synaptic activity (Maday and Holzbaur, 2014; Wang et al.,  
518 2015) and become retrogradely transported along the axon towards the soma (Cheng et al., 2015a;  
519 Maday et al., 2012). An unresolved question is which synaptic proteins become associated with  
520 autophagic cargos. A related question is whether presynaptic autophagy leads to the en-mass removal  
521 of SVs or whether can it selectively scavenge damaged proteins. Our ability to damage SV proteins  
522 with light and induce autophagy provides a unique opportunity to explore these questions. In an initial  
523 experiment, we examined whether Supernova tagged Synaptophysin (Syp-SN) appears in  
524 extrasynaptic eGFP-LC3 positive puncta following light-induced ROS production. To distinguish  
525 between synaptic and extrasynaptic eGFP-LC3 organelles, cultures were fixed and stained with the  
526 presynaptic active zone protein Bassoon and quantified for the fraction of extrasynaptic eGFP-LC3  
527 puncta negative for Bassoon but positive for synaptic proteins 1 hour after bleaching.

528 In experiments with Syp-SN, we observed that more than 70% of extrasynaptic eGFP-LC3 puncta  
529 (also referred to as autophagy cargo organelles) are positive for Syp-SN (Figure 8A and D). This  
530 suggests that ROS-damaged Syp-SN is indeed a cargo of these organelles. To investigate whether the  
531 presence of Syp-SN in autophagy cargo organelles represents the en-mass engulfment of SVs or the  
532 selective removal of this damaged protein, we monitor the distribution of endogenous

533 Synaptotagmin1 within the same neurons, a second core constituent of SVs, in extrasynaptic  
534 autophagy organelles following light-induced damage to Synaptophysin-SN. As Synaptotagmin1 is not  
535 known to directly interact with Synaptophysin, we reasoned that the ROS mediated damage to Syp-SN  
536 would not necessarily damage Synaptotagmin on the same SV. Interestingly, the fraction of  
537 extrasynaptic autophagy organelles that are positive for Synaptotagmin1 (Syt1) is dramatically  
538 smaller than the fraction of Syp-SN positive autophagy cargo organelles (Figure 8A and D).

539 To confirm the selectivity of autophagic cargo after Supernova-induced damage, we also  
540 quantified the fraction of Syt-SN positive extrasynaptic autophagy cargo organelles 1 hour after  
541 bleaching. As with Syp-SN, more than 65% of the extrasynaptic eGFP-LC3 puncta colocalized with Syt-  
542 SN, while only 18% of the endogenous Synaptophysin1 (Syp1) was present at these sites (Figure 8B  
543 and E). These data indicate that the autophagic machinery within presynaptic boutons can detect and  
544 selectively remove damaged SV proteins.

545 The low but significant presence of endogenous Synaptophysin1 and Synaptotagmin1 in eGFP-  
546 LC3 puncta could arise either from the peripheral damage of ROS or be part of the basal flux of these  
547 proteins through this pathway. We thus examined whether under basal condition endogenous  
548 Synaptophysin1 and Synaptotagmin1 versus Synapsin1 associate with extrasynaptic eGFP-LC3 puncta.  
549 Here, we observed that higher levels of both endogenous Synaptophysin1 and Synaptotagmin 1 were  
550 found at extrasynaptic eGFP-LC3 puncta compared to Synapsin1 (Figure 6C and F). These data indicate  
551 that these SV proteins may be cleared through this degradative pathway.

552

### 553 **Synaptic autophagy acts as a beneficial surveillance mechanism maintaining synapse function.**

554 A fundamental question within the synaptic proteostasis field is what roles do different clearance  
555 systems play during synaptic transmission. Most studies to date on autophagy rely either on the  
556 analysis of genetic ablation and inactivation of key autophagic proteins (Atg5 and Atg7) (Rubinsztein  
557 et al., 2011; Russell et al., 2014) or the activation of autophagy with drugs like rapamycin, none of  
558 which are specific for the synapse and generally trigger a homeostatic response from other systems  
559 masking a specific role of autophagy in the system. Having shown that light-induced ROS production  
560 can be used to rapidly (5 minutes) trigger the autophagic clearance of selectively damaged SV

561 proteins, we were keen to explore whether presynaptic autophagy contributes to the real-time  
562 maintenance of synaptic function. As an initial test of this concept, we examined whether the ROS-  
563 induced damage of Synaptophysin-Supernova and subsequent induction of autophagy affected the  
564 functional recycling of SVs based on the activity dependent uptake of the styryl dye FM 1-43 (Cochilla  
565 et al., 1999). This was accomplished by performing FM1-43 uptake experiments approximately 5  
566 minutes after photobleaching Syp-SN positive boutons. Interestingly, no difference in the efficiency of  
567 FM dye uptake could be detected between bleached and unbleached synapses under basal conditions  
568 (Figure 9A and D). These data indicate that either the damage created during ROS production is too  
569 gentle to affect synaptic function or that the induced autophagy (Figure 2) is sufficient to remove these  
570 damaged SV proteins thus maintaining synaptic function. To test this concept, we added 1 $\mu$ M  
571 wortmannin 1 minute before photobleaching and maintained it in the tyrodes buffer before and  
572 during loading synapses with FM1-43. Intriguingly, under these conditions, the ROS-induced damage  
573 of Syp-SN decreases the subsequent loading of FM1-43 within the bleached area compared to those  
574 outside (Figure 9B). We quantified the amount of FM dye uptake dependent on the amount of Syp-SN  
575 present at the bouton assuming that more Syp-SN causes more damage to the terminal. ROS mediated  
576 damage of Syp-SN had no effect on the slope of the linear regression analysis when autophagy was  
577 allowed to operate normally (Figure 9C and D), but significantly reduced the slope when the induction  
578 of autophagy was blocked with 1 $\mu$ M wortmannin (Figure 9C and E). Importantly, the addition of  
579 wortmannin alone did not alter the uptake of FM1-43 or the slope of the linear regression analysis  
580 (Figure 9B, C and E). These data indicate that autophagy may operate in real-time to maintain the  
581 integrity and functionality of SVs.

582 To assess the specificity of this effect, we examined whether the ROS-induced damage of the  
583 peripheral SV protein Synapsin also affected the efficiency of FM dye loading. As above, FM1-43  
584 loading was performed ~5 minutes after damaging Syn-SN. Here, we saw no difference in the extent of  
585 FM dye uptake between bleached and unbleached synapses under physiological conditions (Figure 9F  
586 and I). We also observed no difference in FM dye uptake between bleached and unbleached synapses  
587 in the presence of 1 $\mu$ M wortmannin (Figure 9G and J). It should be noted that light damage to Syn-SN  
588 expressing boutons does not induce visible synaptic autophagy during the initial 5 minutes following



589 damage (Figure 6K). This suggests that the superoxide generated by Synapsin-SN only modestly  
590 damages SVs compared to the integral membrane protein Synaptophysin-SN. Moreover, these data  
591 indicate that autophagy plays a minor role in the clearance of Synapsin-SN.

592 In order to confirm the light-dependent change in FM dye uptake under autophagy inhibition  
593 (Figure 9E), we performed electrophysiological experiments. Here, EPSC amplitudes were recorded  
594 from autaptic neurons, infected with FU-Syp-SN-P2A-eGFP-LC3 at 2-3 DIV, at 13-18 DIV. Similar to FM  
595 dye uptake experiments, bleaching alone did not robustly change the EPSC amplitude (Figure 10A and  
596 D) as well as 1 $\mu$ M wortmannin without bleaching (Figure 10B and D). However, under autophagy  
597 inhibition with 1 $\mu$ M wortmannin and bleaching, the decrease in EPSC amplitudes was significantly  
598 higher (Figure 10C and D). Together these data indicate that autophagy can play a real-time role in the  
599 maintenance of synaptic transmission.

600

## 601 **Discussion**

602

603 Mechanisms regulating quality control and turnover of synaptic proteins are fundamental to  
604 synapse integrity, however, they are not well understood. In this study, we provide evidence that  
605 autophagy can be rapidly induced within presynaptic boutons either by the mTOR inhibitor rapamycin  
606 or by the selective damage of SV proteins through superoxides. The time range of autophagy induction  
607 is consistent with the concept that the machinery is maintained and regulated within presynaptic  
608 boutons. Our data also suggest a real-time role for autophagy in maintaining synaptic function, as  
609 without it the accumulation of damaged SV proteins can compromise synaptic transmission.

610 A prerequisite for a real-time functionality for autophagy within presynaptic boutons is its  
611 activation on short time scales (seconds/minutes) after insults that damage presynaptic proteins.  
612 Studies show that autophagic organelles appear within axons and presynaptic boutons 3-7 hours  
613 following the addition of rapamycin (Hernandez et al., 2012), 48 hours after treatment with Sonic  
614 Hedgehog (Petralia et al., 2013) and after neuronal activity (Soukup et al., 2016; Wang et al., 2015).  
615 Moreover, Bassoon, as well as presynaptic proteins like Rab26 and Endophilin A have been  
616 functionally linked to the autophagy machinery (Binotti et al., 2015; Okerlund et al., 2017;  
617 Vanhauwaert et al., 2017) of which Atg5, Atg16, LC3 and p62 have been localized to presynaptic  
618 boutons (Okerlund et al., 2017). However, as autophagosomes are highly mobile (Cheng et al., 2015b;  
619 Maday et al., 2012), it remains unclear whether they arise within boutons or simply accumulate there.

620 In the current study, we developed a lentiviral vector, expressing a SV protein and the autophagy  
621 marker LC3 to monitor autophagic structures in real-time. Similar to earlier studies (Hernandez et al.,  
622 2012), we observed low basal autophagy levels within axons (Figure 1F). However, eGFP-LC3 levels  
623 increase within 10 minutes within presynaptic boutons and axons following 2 $\mu$ M rapamycin treatment  
624 (Figure 1G, K and L), which is much shorter than reported earlier. eGFP-LC3 accumulation was indeed  
625 due to elevated autophagy as its increase was blocked by 1 $\mu$ M wortmannin (Figure 1N, O and P)  
626 (Codogno et al., 2011; Mizushima et al., 2011).

627 Although the induction of axonal and presynaptic autophagy is faster than previously recognized,  
628 the addition of rapamycin is neither specific for any one neuronal compartment, nor a natural inducer

629 of autophagy (Deng et al., 2017). Therefore we developed a vector system that allows us to generate a  
630 spatiotemporally controlled insult within presynaptic boutons. We made use of the fact that free  
631 radicals trigger the damage of proteins *in vivo* (Jarvela and Linstedt, 2014) and tagged synaptic  
632 proteins with a genetically encoded photosensitizer Supernova (Takemoto et al., 2013). With similar  
633 approaches it has earlier been possible to damage mitochondria and induce mitophagy (Ashrafi et al.,  
634 2014; Wang et al., 2012; Yang and Yang, 2011).

635 ROS induced damage of Synaptophysin led to a very rapid induction of autophagy, indicated by  
636 the accumulation of eGFP-LC3 within presynaptic boutons within 5 minutes and its spread into axons  
637 over time (1-2 hours) (Figure 2I and K). The rapid temporal accumulation of LC3 in boutons was also  
638 observed for autophagic vacuoles, as detected by electron microscopy (Figure 4D). These data indicate  
639 that the autophagy machinery is present within presynaptic terminals and can be engaged following a  
640 local insult within minutes.

641 A fundamental question raised by our study is whether ROS damage to SV proteins exclusively  
642 turns on autophagy as clearance mechanism or multiple protein degradation systems. The endo-  
643 lysosomal system has been reported to also clear SV proteins in response to ongoing synaptic activity  
644 (Sheehan et al., 2016; Uytterhoeven et al., 2011). One hallmark of this pathway is the appearance of  
645 multivesicular bodies (MVB) (Raiborg and Stenmark, 2009). We failed to observe a significant increase  
646 in the number of synaptic MVBs on electron microscopy level (Figure 4E and H), indicating that in  
647 contrast to autophagy, the endo-lysosomal system is not robustly engaged by ROS mediated protein  
648 damage. However, monitoring Rab7 and Chmp2b levels (Sheehan et al., 2016; Stenmark, 2009) by  
649 light microscopy, we did observe a modest increase in their colocalization with Synaptophysin-SN,  
650 following ROS production (Figure 5). Thus we cannot rule out that ROS mediated damage to SV  
651 proteins can trigger the activation of several degradative systems. Interestingly, the study from  
652 Sheehan et al. (2016) shows that only a subset of SV proteins is preferentially degraded by the endo-  
653 lysosomal system, highlighting the importance to address in the future if distinct SV proteins are  
654 degraded via specific and therefore separate pathways and how they are being tagged.

655 Our data indicate that autophagy induction is not sole dependent on the damage of  
656 Synaptophysin. Also the destruction of Synaptotagmin as well as Synapsin leads to elevated autophagy

657 levels at presynapses (Figure 6). However, eGFP-LC3 levels increased with a slower time course (~1  
658 hour time range) (Figure 6). The discrepancy could be indicative for less ROS mediated damage to  
659 these SV proteins, possibly due to an increased distance of Supernova from the surface of SVs.  
660 Synaptotagmin has a large cytoplasmic region (346aa; comprised of two C2 domains) (Ybe et al.,  
661 2000), compared to the shorter 95aa C-terminal tail in Synaptophysin (Gordon and Cousin, 2014) and  
662 Synapsin is only peripherally associated with SV membranes, thus further away. An interesting feature  
663 of Synapsin is that only about 50% is directly bound to SVs and that it is released from SVs during  
664 synaptic activity (Cesca et al., 2010; Chi et al., 2001). This raises the interesting question whether the  
665 association of the protein with SVs is necessary to induce autophagy after Synapsin damage. Indeed,  
666 dis-engaging Synapsin-SN from SVs during light triggered ROS production did not induce elevated  
667 eGFP-LC3 levels (Figure 7E and F). These data support the hypothesis that it is the ROS mediated  
668 damage to SVs that triggers the activation of presynaptic autophagy.

669 An additional question raised by our study is whether the clearance mechanisms triggered by ROS  
670 mediated damage leads to the selective removal of only the damaged SV protein or the elimination of  
671 the entire associated SV. Indeed, about 70% of extrasynaptic eGFP-LC3 puncta were also positive for  
672 Synaptophysin-SN following ROS-mediated damage (Figure 8D). Intriguingly, a much smaller fraction  
673 (18%) of these puncta were positive for endogenous SV protein such as Synaptotagmin, which is not  
674 known to directly interact with Synaptophysin (Bonanomi et al., 2007; Rizzoli, 2014). These data  
675 suggest that presynaptic autophagy can specifically remove damaged SV proteins from synapses. This  
676 concept is supported by a reciprocal performed experiment with neurons expressing Synaptotagmin-  
677 SN. Here, we also observed a dramatic recruitment of Synaptotagmin-SN into extrasynaptic eGFP-LC3  
678 puncta, but only modest levels of endogenous Synaptophysin (Figure 8E), implying that ROS mediated  
679 damage caused by Supernova is rather limited and primarily affects co-tethered proteins, a concept  
680 consistent with the low quantum yield of Supernova (Shu et al., 2011; Trewin et al., 2018) and the  
681 limited damage half-radius of 3-4nm (Takemoto et al., 2013). Presumably, using the more potent  
682 photosensitizer miniSOG (Lin et al., 2013; Qi, 2012; Shu et al., 2011), more SV proteins could be  
683 damaged, causing a much bigger insult perhaps leading to the wholesale removal of SVs. Conceptually,  
684 a selective removal model also makes metabolic sense, as it would allow for the differential removal of

685 specific mis-folded or damaged proteins, consistent with different half-lives of SV proteins (Cohen et  
686 al., 2013).

687 The rapid induction of presynaptic autophagy within minutes suggests that it possibly has real-  
688 time functions at synapses, e.g. helping to maintain synaptic health and integrity. Studies by Lin et al.  
689 (2013) showed that targeting miniSOG via Synaptophysin or VAMP2 to SVs leads to a real-time  
690 disruption of neurotransmitter release following light activation. Although the precise mechanism was  
691 not investigated, loss of function is most likely due to the inactivation of the tagged and/or  
692 neighboring SV proteins (Jacobson et al., 2008; Qi, 2012). In contrast, in our experiments with  
693 Supernova-tagged Synaptophysin, we did not observe an overt change in synaptic function, assessed  
694 by the uptake of FM1-43 dye or the evoked release of neurotransmitter following light-induced ROS  
695 production (Figure 9). This suggests that protein damage caused by Supernova radiation is less potent  
696 than that induced with miniSOG-Synaptophysin. Intriguingly, when the induction of autophagy was  
697 blocked during ROS-mediated damage of Synaptophysin-SN, the extent of FM1-43 uptake, as well as  
698 the evoked EPSC amplitude, were reduced (Figure 9 and 10). These data suggest that synaptic  
699 autophagy may function in real-time to remove damaged SV proteins contributing to the maintenance  
700 of synaptic function. This is consistent with the real-time increase in presynaptic autophagy following  
701 ROS mediated damages (Figure 2 and 3).

702 Taken together, these real-time generators of ROS can represent a powerful tool to  
703 spatiotemporally induce damage to synapses and thus increase our understanding of how different  
704 clearance systems function during both health and disease. This will be particularly important for the  
705 study of neurodegenerative disease where the proper function of autophagy and the endo-lysosomal  
706 systems are thought to be crucial for neuronal health (Nixon, 2013; Rubinsztein et al., 2012).

707

708

## 709 **References**

710

711 Ashrafi, G., Schlehe, J.S., LaVoie, M.J., and Schwarz, T.L. (2014). Mitophagy of damaged mitochondria  
712 occurs locally in distal neuronal axons and requires PINK1 and Parkin. *J Cell Biol* 206, 655-670.

713 Banker, G.a.G., K. (1988). Developments in neuronal cell culture. *Nature* 336.

714 Benfenati, F., Valtorta, F., Rossi, M.C., Onofri, F., Sihra, T., and Greengard, P. (1993). Interactions of  
715 synapsin I with phospholipids: possible role in synaptic vesicle clustering and in the maintenance of  
716 bilayer structures. *J Cell Biol* 123, 1845-1855.

717 Binotti, B., Pavlos, N.J., Riedel, D., Wenzel, D., Vorbruggen, G., Schalk, A.M., Kuhnel, K., Boyken, J., Erck,  
718 C., Martens, H., *et al.* (2015). The GTPase Rab26 links synaptic vesicles to the autophagy pathway. *Elife*  
719 4, e05597.

720 Boland, B., Kumar, A., Lee, S., Platt, F.M., Wegiel, J., Yu, W.H., and Nixon, R.A. (2008). Autophagy  
721 induction and autophagosome clearance in neurons: relationship to autophagic pathology in  
722 Alzheimer's disease. *J Neurosci* 28, 6926-6937.

723 Bonanomi, D., Rusconi, L., Colombo, C.A., Benfenati, F., and Valtorta, F. (2007). Synaptophysin I  
724 selectively specifies the exocytic pathway of synaptobrevin 2/VAMP2. *Biochem J* 404, 525-534.

725 Bulina, M.E., Chudakov, D.M., Britanova, O.V., Yanushevich, Y.G., Staroverov, D.B., Chepurnykh, T.V.,  
726 Merzlyak, E.M., Shkrob, M.A., Lukyanov, S., and Lukyanov, K.A. (2006). A genetically encoded  
727 photosensitizer. *Nat Biotechnol* 24, 95-99.

728 Carpenter, C.L., and Cantley, L.C. (1996). Phosphoinositide kinases. *Curr Opin Cell Biol* 8, 153-158.

729 Ceccarelli, B., Hurlbut, W.P., and Mauro, A. (1973). Turnover of transmitter and synaptic vesicles at the  
730 frog neuromuscular junction. *J Cell Biol* 57, 499-524.

731 Cesca, F., Baldelli, P., Valtorta, F., and Benfenati, F. (2010). The synapsins: Key actors of synapse  
732 function and plasticity. *Progress in Neurobiology* 91, 313-348.

- 733 Chang, S., Trimbuch, T., and Rosenmund, C. (2018). Synaptotagmin-1 drives synchronous Ca<sup>2+</sup>-  
734 triggered fusion by C2B-domain-mediated synaptic-vesicle-membrane attachment. *Nat Neurosci* *21*,  
735 33-40.
- 736 Chapman, E.R. (2002). Synaptotagmin: a Ca<sup>2+</sup> sensor that triggers exocytosis? *Nat Rev Mol Cell Biol*  
737 *3*, 498-508.
- 738 Cheng, X.T., Zhou, B., Lin, M.Y., Cai, Q., and Sheng, Z.H. (2015a). Axonal autophagosomes recruit dynein  
739 for retrograde transport through fusion with late endosomes. *J Cell Biol* *209*, 377-386.
- 740 Cheng, X.T., Zhou, B., Lin, M.Y., Cai, Q., and Sheng, Z.H. (2015b). Axonal autophagosomes use the ride-on  
741 service for retrograde transport toward the soma. *Autophagy* *11*, 1434-1436.
- 742 Chi, P., Greengard, P., and Ryan, T.A. (2001). Synapsin dispersion and reclustering during synaptic  
743 activity. *Nat Neurosci* *4*, 1187-1193.
- 744 Chu, C.T., Zhu, J., and Dagda, R. (2007). Beclin 1-independent pathway of damage-induced mitophagy  
745 and autophagic stress: implications for neurodegeneration and cell death. *Autophagy* *3*, 663-666.
- 746 Cochilla, A.J., Angleson, J.K., and Betz, W.J. (1999). Monitoring secretory membrane with FM1-43  
747 fluorescence. *Annu Rev Neurosci* *22*, 1-10.
- 748 Codogno, P., Mehrpour, M., and Proikas-Cezanne, T. (2011). Canonical and non-canonical autophagy:  
749 variations on a common theme of self-eating? *Nat Rev Mol Cell Biol* *13*, 7-12.
- 750 Cohen, L.D., Zuchman, R., Sorokina, O., Muller, A., Dieterich, D.C., Armstrong, J.D., Ziv, T., and Ziv, N.E.  
751 (2013). Metabolic turnover of synaptic proteins: kinetics, interdependencies and implications for  
752 synaptic maintenance. *PLoS One* *8*, e63191.
- 753 Deng, Z., Purtell, K., Lachance, V., Wold, M.S., Chen, S., and Yue, Z. (2017). Autophagy Receptors and  
754 Neurodegenerative Diseases. *Trends Cell Biol* *27*, 491-504.

- 755 Ebrahimi-Fakhari, D., Cantuti-Castelvetri, I., Fan, Z., Rockenstein, E., Masliah, E., Hyman, B.T., McLean,  
756 P.J., and Unni, V.K. (2011). Distinct roles in vivo for the ubiquitin-proteasome system and the  
757 autophagy-lysosomal pathway in the degradation of alpha-synuclein. *J Neurosci* 31, 14508-14520.
- 758 Galluzzi, L., Bravo-San Pedro, J.M., Blomgren, K., and Kroemer, G. (2016). Autophagy in acute brain  
759 injury. *Nat Rev Neurosci* 17, 467-484.
- 760 Gibson, D.G., Young, L., Chuang, R.-Y., Venter, J.C., Hutchison, C.A., and Smith, H.O. (2009). Enzymatic  
761 assembly of DNA molecules up to several hundred kilobases. *Nature Methods* 6, 343-345.
- 762 Gordon, S.L., and Cousin, M.A. (2014). The Sybtraps: control of synaptobrevin traffic by synaptophysin,  
763 alpha-synuclein and AP-180. *Traffic* 15, 245-254.
- 764 Hara, T., Nakamura, K., Matsui, M., Yamamoto, A., Nakahara, Y., Suzuki-Migishima, R., Yokoyama, M.,  
765 Mishima, K., Saito, I., Okano, H., *et al.* (2006). Suppression of basal autophagy in neural cells causes  
766 neurodegenerative disease in mice. *Nature* 441, 885-889.
- 767 Hernandez, D., Torres, C.A., Setlik, W., Cebrian, C., Mosharov, E.V., Tang, G., Cheng, H.C., Kholodilov, N.,  
768 Yarygina, O., Burke, R.E., *et al.* (2012). Regulation of presynaptic neurotransmission by  
769 macroautophagy. *Neuron* 74, 277-284.
- 770 Hilfiker, S., Pieribone, V.A., Nordstedt, C., Greengard, P., and Czernik, A.J. (1999). Regulation of  
771 synaptotagmin I phosphorylation by multiple protein kinases. *J Neurochem* 73, 921-932.
- 772 Jacobson, K., Rajfur, Z., Vitriol, E., and Hahn, K. (2008). Chromophore-assisted laser inactivation in cell  
773 biology. *Trends Cell Biol* 18, 443-450.
- 774 Jarvela, T.S., and Linstedt, A.D. (2014). The application of KillerRed for acute protein inactivation in  
775 living cells. *Curr Protoc Cytom* 69, 12 35 11-12 35 10.
- 776 Jiang, X., Litkowski, P.E., Taylor, A.A., Lin, Y., Snider, B.J., and Moulder, K.L. (2010). A role for the  
777 ubiquitin-proteasome system in activity-dependent presynaptic silencing. *J Neurosci* 30, 1798-1809.



- 778 Johansen, T.L., Trond (2011). Selective autophagy mediated by autophagic adapter proteins.  
779 *Autophagy* 7, 279-296.
- 780 Kim, J.H., Lee, S.R., Li, L.H., Park, H.J., Park, J.H., Lee, K.Y., Kim, M.K., Shin, B.A., and Choi, S.Y. (2011). High  
781 cleavage efficiency of a 2A peptide derived from porcine teschovirus-1 in human cell lines, zebrafish  
782 and mice. *PLoS One* 6, e18556.
- 783 Klionsky, D.J., Abdalla, F.C., Abeliovich, H., Abraham, R.T., Acevedo-Arozena, A., Adeli, K., Agholme, L.,  
784 Agnello, M., Agostinis, P., Aguirre-Ghiso, J.A., *et al.* (2012). Guidelines for the use and interpretation of  
785 assays for monitoring autophagy. *Autophagy* 8, 445-544.
- 786 Komatsu, M., Waguri, S., Chiba, T., Murata, S., Iwata, J., Tanida, I., Ueno, T., Koike, M., Uchiyama, Y.,  
787 Kominami, E., *et al.* (2006). Loss of autophagy in the central nervous system causes neurodegeneration  
788 in mice. *Nature* 441, 880-884.
- 789 Leal-Ortiz, S., Waites, C.L., Terry-Lorenzo, R., Zamorano, P., Gundelfinger, E.D., and Garner, C.C. (2008).  
790 Piccolo modulation of Synapsin1a dynamics regulates synaptic vesicle exocytosis. *J Cell Biol* 181, 831-  
791 846.
- 792 Lee, J.H., Yu, W.H., Kumar, A., Lee, S., Mohan, P.S., Peterhoff, C.M., Wolfe, D.M., Martinez-Vicente, M.,  
793 Massey, A.C., Sovak, G., *et al.* (2010). Lysosomal proteolysis and autophagy require presenilin 1 and are  
794 disrupted by Alzheimer-related PS1 mutations. *Cell* 141, 1146-1158.
- 795 Lemasters, J.J. (2014). Variants of mitochondrial autophagy: Types 1 and 2 mitophagy and  
796 micromitophagy (Type 3). *Redox Biol* 2, 749-754.
- 797 Li, L., Tasic, B., Micheva, K.D., Ivanov, V.M., Spletter, M.L., Smith, S.J., and Luo, L. (2010). Visualizing the  
798 distribution of synapses from individual neurons in the mouse brain. *PLoS One* 5, e11503.
- 799 Liang, Y., and Sigrist, S. (2018). Autophagy and proteostasis in the control of synapse aging and  
800 disease. *Curr Opin Neurobiol* 48, 113-121.
- 801 Lilienbaum, A. (2013). Relationship between the proteasomal system and autophagy. *Int J Biochem*  
802 *Mol Biol* 4, 1-26.

- 803 Lin, J.Y., Sann, S.B., Zhou, K., Nabavi, S., Proulx, C.D., Malinow, R., Jin, Y., and Tsien, R.Y. (2013).  
804 Optogenetic inhibition of synaptic release with chromophore-assisted light inactivation (CALI).  
805 *Neuron* 79, 241-253.
- 806 Linden, K.G., Liao, J.C., and Jay, D.G. (1992). Spatial specificity of chromophore assisted laser  
807 inactivation of protein function. *Biophys J* 61, 956-962.
- 808 Maas, C., Torres, V.I., Altroock, W.D., Leal-Ortiz, S., Wagh, D., Terry-Lorenzo, R.T., Fejtova, A.,  
809 Gundelfinger, E.D., Ziv, N.E., and Garner, C.C. (2012). Formation of Golgi-derived active zone precursor  
810 vesicles. *J Neurosci* 32, 11095-11108.
- 811 Maday, S., and Holzbaur, E.L. (2014). Autophagosome biogenesis in primary neurons follows an  
812 ordered and spatially regulated pathway. *Dev Cell* 30, 71-85.
- 813 Maday, S., Wallace, K.E., and Holzbaur, E.L. (2012). Autophagosomes initiate distally and mature  
814 during transport toward the cell soma in primary neurons. *J Cell Biol* 196, 407-417.
- 815 Martinez-Vicente, M., Tallochy, Z., Wong, E., Tang, G., Koga, H., Kaushik, S., de Vries, R., Arias, E., Harris,  
816 S., Sulzer, D., *et al.* (2010). Cargo recognition failure is responsible for inefficient autophagy in  
817 Huntington's disease. *Nat Neurosci* 13, 567-576.
- 818 Meberg, P.J., and Miller, M.W. (2003). Culturing hippocampal and cortical neurons. *Methods Cell Biol*  
819 71, 111-127.
- 820 Mizushima, N., Yoshimori, T., and Levine, B. (2010). Methods in mammalian autophagy research. *Cell*  
821 140, 313-326.
- 822 Mizushima, N., Yoshimori, T., and Ohsumi, Y. (2011). The role of Atg proteins in autophagosome  
823 formation. *Annu Rev Cell Dev Biol* 27, 107-132.
- 824 Nixon, R.A. (2013). The role of autophagy in neurodegenerative disease. *Nat Med* 19, 983-997.

- 825 Nixon, R.A., Wegiel, J., Kumar, A., Yu, W.H., Peterhoff, C., Cataldo, A., and Cuervo, A.M. (2005). Extensive  
826 involvement of autophagy in Alzheimer disease: an immuno-electron microscopy study. *J Neuropathol*  
827 *Exp Neurol* 64, 113-122.
- 828 Okerlund, N.D., Schneider, K., Leal-Ortiz, S., Montenegro-Venegas, C., Kim, S.A., Garner, L.C., Waites, C.L.,  
829 Gundelfinger, E.D., Reimer, R.J., and Garner, C.C. (2017). Bassoon Controls Presynaptic Autophagy  
830 through Atg5. *Neuron* 93, 897-913 e897.
- 831 Petralia, R.S., Schwartz, C.M., Wang, Y.X., Kawamoto, E.M., Mattson, M.P., and Yao, P.J. (2013). Sonic  
832 hedgehog promotes autophagy in hippocampal neurons. *Biol Open* 2, 499-504.
- 833 Qi, Y.B.G., Emma J.; Shu, Xiaokun; Tsien, Roger Y., and Jin, Yishi (2012). Photo-inducible cell ablation in  
834 *Caenorhabditis elegans* using the genetically encoded singlet  
835 oxygen generating protein miniSOG. *PNAS* 109.
- 836 Raiborg, C., and Stenmark, H. (2009). The ESCRT machinery in endosomal sorting of ubiquitylated  
837 membrane proteins. *Nature* 458, 445-452.
- 838 Rizzoli, S.O. (2014). Synaptic vesicle recycling: steps and principles. *EMBO J* 33, 788-822.
- 839 Rubinsztein, D.C., Codogno, P., and Levine, B. (2012). Autophagy modulation as a potential therapeutic  
840 target for diverse diseases. *Nat Rev Drug Discov* 11, 709-730.
- 841 Rubinsztein, D.C., Marino, G., and Kroemer, G. (2011). Autophagy and aging. *Cell* 146, 682-695.
- 842 Russell, R.C., Yuan, H.X., and Guan, K.L. (2014). Autophagy regulation by nutrient signaling. *Cell Res* 24,  
843 42-57.
- 844 Sheehan, P., Zhu, M., Beskow, A., Vollmer, C., and Waites, C.L. (2016). Activity-Dependent Degradation  
845 of Synaptic Vesicle Proteins Requires Rab35 and the ESCRT Pathway. *J Neurosci* 36, 8668-8686.
- 846 Shu, X., Lev-Ram, V., Deerinck, T.J., Qi, Y., Ramko, E.B., Davidson, M.W., Jin, Y., Ellisman, M.H., and Tsien,  
847 R.Y. (2011). A genetically encoded tag for correlated light and electron microscopy of intact cells,  
848 tissues, and organisms. *PLoS Biol* 9, e1001041.

- 849 Soukup, S.F., Kuenen, S., Vanhauwaert, R., Manetsberger, J., Hernandez-Diaz, S., Swerts, J., Schoovaerts,  
850 N., Vilain, S., Goukko, N.V., Vints, K., *et al.* (2016). A LRRK2-Dependent EndophilinA Phosphoswitch Is  
851 Critical for Macroautophagy at Presynaptic Terminals. *Neuron* 92, 829-844.
- 852 Spencer, B., Potkar, R., Trejo, M., Rockenstein, E., Patrick, C., Gindi, R., Adame, A., Wyss-Coray, T., and  
853 Masliah, E. (2009). Beclin 1 gene transfer activates autophagy and ameliorates the neurodegenerative  
854 pathology in alpha-synuclein models of Parkinson's and Lewy body diseases. *J Neurosci* 29, 13578-  
855 13588.
- 856 Spilman, P., Podlutskaya, N., Hart, M.J., Debnath, J., Gorostiza, O., Bredesen, D., Richardson, A., Strong, R.,  
857 and Galvan, V. (2010). Inhibition of mTOR by rapamycin abolishes cognitive deficits and reduces  
858 amyloid-beta levels in a mouse model of Alzheimer's disease. *PLoS One* 5, e9979.
- 859 Stenmark, H. (2009). Rab GTPases as coordinators of vesicle traffic. *Nat Rev Mol Cell Biol* 10, 513-525.
- 860 Takemoto, K., Matsuda, T., Sakai, N., Fu, D., Noda, M., Uchiyama, S., Kotera, I., Arai, Y., Horiuchi, M.,  
861 Fukui, K., *et al.* (2013). SuperNova, a monomeric photosensitizing fluorescent protein for  
862 chromophore-assisted light inactivation. *Sci Rep* 3, 2629.
- 863 Tammineni, P., Ye, X., Feng, T., Aikal, D., and Cai, Q. (2017). Impaired retrograde transport of axonal  
864 autophagosomes contributes to autophagic stress in Alzheimer's disease neurons. *Elife* 6.
- 865 Trewin, A.J., Berry, B.J., Wei, A.Y., Bahr, L.L., Foster, T.H., and Wojtovich, A.P. (2018). Light-induced  
866 oxidant production by fluorescent proteins. *Free Radic Biol Med*.
- 867 Tsuruel, S., Geva, R., Zamorano, P., Dresbach, T., Boeckers, T., Gundelfinger, E.D., Garner, C.C., and Ziv,  
868 N.E. (2006). Local sharing as a predominant determinant of synaptic matrix molecular dynamics. *PLoS*  
869 *Biol* 4, e271.
- 870 Uytterhoeven, V., Kuenen, S., Kasprovicz, J., Miskiewicz, K., and Verstreken, P. (2011). Loss of  
871 skywalker reveals synaptic endosomes as sorting stations for synaptic vesicle proteins. *Cell* 145, 117-  
872 132.

- 873 Vanhauwaert, R., Kuenen, S., Masius, R., Bademosi, A., Manetsberger, J., Schoovaerts, N., Bounti, L.,  
874 Gontcharenko, S., Swerts, J., Vilain, S., *et al.* (2017). The SAC1 domain in synaptojanin is required for  
875 autophagosome maturation at presynaptic terminals. *EMBO J* 36, 1392-1411.
- 876 Vijayan, V., and Verstreken, P. (2017). Autophagy in the presynaptic compartment in health and  
877 disease. *J Cell Biol* 216, 1895-1906.
- 878 Vingtdeux, V., Sergeant, N., and Buee, L. (2012). Potential contribution of exosomes to the prion-like  
879 propagation of lesions in Alzheimer's disease. *Front Physiol* 3, 229.
- 880 Waites, C.L., and Garner, C.C. (2011). Presynaptic function in health and disease. *Trends Neurosci* 34,  
881 326-337.
- 882 Waites, C.L., Leal-Ortiz, S.A., Okerlund, N., Dalke, H., Fejtova, A., Altroock, W.D., Gundelfinger, E.D., and  
883 Garner, C.C. (2013). Bassoon and Piccolo maintain synapse integrity by regulating protein  
884 ubiquitination and degradation. *EMBO J* 32, 954-969.
- 885 Wang, T., Martin, S., Papadopulos, A., Harper, C.B., Mavlyutov, T.A., Niranjan, D., Glass, N.R., Cooper-  
886 White, J.J., Sibarita, J.B., Choquet, D., *et al.* (2015). Control of autophagosome axonal retrograde flux by  
887 presynaptic activity unveiled using botulinum neurotoxin type a. *J Neurosci* 35, 6179-6194.
- 888 Wang, Y., Nartiss, Y., Steipe, B., McQuibban, G.A., and Kim, P.K. (2012). ROS-induced mitochondrial  
889 depolarization initiates PARK2/PARKIN-dependent mitochondrial degradation by autophagy.  
890 *Autophagy* 8, 1462-1476.
- 891 Wang, Y.C., Lauwers, E., and Verstreken, P. (2017). Presynaptic protein homeostasis and neuronal  
892 function. *Curr Opin Genet Dev* 44, 38-46.
- 893 Yang, J.Y., and Yang, W.Y. (2011). Spatiotemporally controlled initiation of Parkin-mediated mitophagy  
894 within single cells. *Autophagy* 7, 1230-1238.

- 895 Yao, I., Takagi, H., Ageta, H., Kahyo, T., Sato, S., Hatanaka, K., Fukuda, Y., Chiba, T., Morone, N., Yuasa, S.,  
896 *et al.* (2007). SCRAPPER-dependent ubiquitination of active zone protein RIM1 regulates synaptic  
897 vesicle release. *Cell* *130*, 943-957.
- 898 Ybe, J.A., Wakeham, D.E., Brodsky, F.M., and Hwang, P.K. (2000). Molecular structures of proteins  
899 involved in vesicle fusion. *Traffic* *1*, 474-479.
- 900 Yi, J.J., and Ehlers, M.D. (2005). Ubiquitin and protein turnover in synapse function. *Neuron* *47*, 629-  
901 632.
- 902 Yue, Z., Friedman, L., Komatsu, M., and Tanaka, K. (2009). The cellular pathways of neuronal autophagy  
903 and their implication in neurodegenerative diseases. *Biochim Biophys Acta* *1793*, 1496-1507.
- 904 Zhu, J.H., Horbinski, C., Guo, F., Watkins, S., Uchiyama, Y., and Chu, C.T. (2007). Regulation of autophagy  
905 by extracellular signal-regulated protein kinases during 1-methyl-4-phenylpyridinium-induced cell  
906 death. *Am J Pathol* *170*, 75-86.
- 907
- 908

## 909 **Figure legends**

910 **Figure 1** – *Rapamycin induces rapid increase in presynaptic autophagy.*

911 (A) Schematic of lentiviral vector FU-Syp-mCherry-P2A-eGFP-LC3 expressing Synaptophysin (Syp)-  
912 mCherry and eGFP-LC3 under an ubiquitin promoter. P2A cleavage site separates the two proteins.

913 (B) Autophagy induction (EBSS + 100 $\mu$ M chloroquine for 2 hours) of FU-Syp-mCherry-P2A-eGFP-LC3  
914 expressing HeLa cells, demonstrating that following autophagy induction eGFP-LC3 puncta colocalize  
915 with both endogenous LC3 and p62, but not Syp-mCherry.

916 (C) Live-cell images of cultured hippocampal neurons expressing with FU-Syp-mCherry-P2A-eGFP-LC3  
917 at 2 DIV and analyzed at 14 DIV. Syp-mCherry and eGFP-LC3 exhibit different patterns indicating P2A  
918 mediated cleavage (arrow indicates Syp-mCherry puncta, arrowhead indicates colocalization of Syp-  
919 mCherry and eGFP-LC3).

920 (D) Representative images of hippocampal neurons infected with FU-Syp-mCherry-P2A-eGFP-LC3 and  
921 immunostained with antibodies against the postsynaptic protein Homer1. Colocalization of Syp-  
922 mCherry and Homer1 indicate presynaptic targeting of Syp-mCherry.

923 (E) Western Blot of lysates from hippocampal neurons infected (TD) or un-infected (UT) with FU-Syp-  
924 mCherry-P2A-eGFP-LC3 and stained with mCherry antibodies. Upper band: uncleaved Syp-mCherry-  
925 eGFP-LC3 fusion protein. Lower band: cleaved Syp-mCherry. High ratio of Syp-mCh/Syp-mCh-P2A-  
926 eGFP-LC3 band indicate efficient cleavage.

927 (F-H) Images of hippocampal neurons expressing FU-Syp-mCherry-P2A-eGFP-LC3, treated with 2 $\mu$ M  
928 rapamycin for 2 hours (F) or 10 min (G and H) before fixation (F-H) and staining with antibodies  
929 against p62 (H).

930 (I-M) Quantification of the normalized intensity of eGFP-LC3 levels at Syp-mCherry puncta (I and K) as  
931 well as the number of puncta/100  $\mu$ M of axon (J and L) after 2 hours (I and J) or 10 min (K and L) of  
932 2 $\mu$ M rapamycin treatment. (I: control =  $1 \pm 0.094$ , n = 412 synapses, 3 independent experiments; 2 $\mu$ M  
933 R (2h) =  $1.36 \pm 0.164$ , n = 301 synapses, 3 independent experiments, p=0.0414). (J: control =  $2.72 \pm$   
934  $0.529$ , n = 40 axons, 4 independent experiments; 2 $\mu$ M R (2h) =  $4.80 \pm 0.928$ , n = 20 axons, 2  
935 independent experiments, p=0.0407). (K: control =  $1 \pm 0.094$ , n = 412 synapses, 3 independent  
936 experiments; 2 $\mu$ M R (10min) =  $1.73 \pm 0.092$ , n = 343 synapses, 3 independent experiments; p<0.0001).

937 (L: control =  $2.72 \pm 0.529$ , n = 40 axons, 4 independent experiments;  $2\mu\text{M R (10min)} = 5.05 \pm 0.695$ , n  
938 = 47 axons, 4 independent experiments;  $p=0.0111$ ). Quantification of the normalized p62 levels at  
939 eGFP-LC3 puncta (M) (M: control =  $1 \pm 0.170$ , n = 50 puncta, 3 independent experiments;  $2\mu\text{M R}$   
940 (10min) =  $1.91 \pm 0.283$ , n = 52 puncta, 3 independent experiments;  $p=0.0072$ ) confirming that eGFP-  
941 LC3 puncta depict autophagic organelles.

942 (N) Images of hippocampal neurons infected with FU-Syp-mCherry-P2A-eGFP-LC3 and treated with  
943  $1\mu\text{M}$  wortmannin prior and during a 10 min incubation with  $2\mu\text{M}$  rapamycin.

944 (O and P) Quantification of (N) showing that wortmannin suppresses the induction of autophagy at  
945 Syp-mCherry puncta (O) and along axons (P) following the addition of rapamycin (O: control =  $1 \pm$   
946  $0.073$ , n = 540 synapses, 4 independent experiments;  $2\mu\text{M R (10min)} = 1.63 \pm 0.071$ , n = 469 synapses,  
947 4 independent experiments;  $2\mu\text{M R} + 1\mu\text{M W (10min)} = 0.98 \pm 0.036$ , n = 152 synapses, 2 independent  
948 experiments,  $p<0.0001$  and  $p<0.0001$ ). (P: control =  $2.72 \pm 0.529$ , n = 40 axons, 4 independent  
949 experiments;  $2\mu\text{M R (10min)} = 5.05 \pm 0.695$ , n = 47 axons, 4 independent experiments;  $2\mu\text{M R} + 1\mu\text{M}$   
950  $W (10min) = 1.92 \pm 0.573$ , n = 20 axons, 2 independent experiments,  $p=0.0187$  and  $p=0.01$ ).

951 Scale bars:  $10\mu\text{m}$  (B, C and D) and  $5\mu\text{m}$  (F, G, H and N). Error bars represent SEM. Unpaired T-test (I, J,  
952 K, L and M) and ANOVA Tukey's multiple comparisons test (O and P) was used to evaluate statistical  
953 significance.

954

955 **Figure 2** – *Rapid induction of autophagy by ROS mediated damage by Synaptophysin-Supernova.*

956 (A) Schematic of FU-Syp-Supernova-P2A-eGFP-LC3 expression vector.

957 (B) Low-magnification images of hippocampal neurons expressing FU-Syp-Supernova-P2A-eGFP-LC3  
958 grown on top of uninfected neurons before and after photobleaching a region of interest (dashed line).  
959 Boxes represent areas within (red) and outside (black) bleached area used for analysis.

960 (C-E) Images of axon segments (5 min, 1 hour and 2 hours after bleaching) that were subsequently  
961 fixed and stained with antibodies against GFP to detect eGFP-LC3 and Supernova to detect Syp-SN.  
962 Data indicate that autophagy at synapses can be rapidly induced through Syp-SN photobleaching.



963 (F) Quantification of normalized eGFP-LC3 intensities within Syp-SN puncta 5 min (C) after bleaching  
964 (unbleached =  $1 \pm 0.057$ , n = 119 synapses, 3 independent experiments; bleached =  $1.43 \pm 0.113$ , n =  
965 132 synapses, 3 independent experiments, p=0.001).

966 (G) Quantification of the normalized number of eGFP-LC3 puncta per unit axon length, in axons 5 min  
967 after photobleaching (C) (unbleached =  $1 \pm 0.166$ , n = 17 axons, 3 independent experiments; bleached  
968 =  $0.70 \pm 0.119$ , n = 18 axons, 3 independent experiments).

969 (H) Quantification of normalized eGFP-LC3 intensities within Syp-SN puncta 1 hour (D) after bleaching  
970 (unbleached =  $1 \pm 0.071$ , n = 132 synapses, 3 independent experiments; bleached =  $1.43 \pm 0.117$ , n =  
971 167 synapses, 3 independent experiments, p=0.0035).

972 (I) Quantification of the normalized number of eGFP-LC3 puncta per unit axon length, in axons 1 hour  
973 after photobleaching (D) (unbleached =  $1 \pm 0.146$ , n = 24 axons, 3 independent experiments; bleached  
974 =  $1.37 \pm 0.166$ , n = 24 axons, 3 independent experiments).

975 (J) Quantification of normalized eGFP-LC3 intensities within Syp-SN puncta 2 hours (E) after bleaching  
976 (unbleached =  $1 \pm 0.054$ , n = 136 synapses, 3 independent experiments; bleached =  $1.22 \pm 0.065$ , n =  
977 141 synapses, 3 independent experiments, p=0.0111).

978 (K) Quantification of the normalized number of eGFP-LC3 puncta per unit axon length, in axons 2  
979 hours after photobleaching (E) (unbleached =  $1 \pm 0.173$ , n = 23 axons, 3 independent experiments;  
980 bleached =  $2.75 \pm 0.336$ , n = 22 axons, 3 independent experiments, p<0.0001).

981 Scale bars: 50 $\mu$ m (B), 10 $\mu$ m (C, D and E). Error bars represent SEM. Unpaired T-test was used to  
982 evaluate statistical significance.

983

984 **Figure 3** – *ROS induced increase in eGFP-LC3 levels at presynaptic boutons is PI3K-dependent.*

985 (A and B) Images of hippocampal axons/synapses expressing FU-Syp-Supernova-P2A-eGFP-LC3 that  
986 were fixed and stained with antibodies against GFP and Supernova 2 hours after photobleaching,  
987 either in the absence (A) or presence of 1 $\mu$ M wortmannin (B).

988 (C and D) Quantification of normalized eGFP-LC3 intensities within Syp-SN puncta (C) or the  
989 normalized number of eGFP-LC3 puncta per unit axon length (D) in culture not treated with  
990 wortmannin. (C: unbleached =  $1 \pm 0.057$ , n = 174 synapses, 3 independent experiments; bleached =

991  $1.22 \pm 0.073$ ,  $n = 174$  synapses, 3 independent experiments,  $p=0.0173$ ) (D: unbleached =  $1 \pm 0.221$ ,  $n =$   
992 19 axons, 3 independent experiments; bleached =  $2.35 \pm 0.403$ ,  $n = 21$  axons, 3 independent  
993 experiments,  $p=0.0071$ ).

994 (E and F) Quantification of normalized eGFP-LC3 intensities within Syp-SN puncta (E) or number of  
995 eGFP-LC3 puncta per unit axon length (F) in culture treated with wortmannin before and after  
996 photobleaching. (E: unbleached =  $1 \pm 0.057$ ,  $n = 179$  synapses, 3 independent experiments; bleached =  
997  $0.95 \pm 0.055$ ,  $n = 164$  synapses, 3 independent experiments). (F: unbleached =  $1 \pm 0.228$ ,  $n = 18$  axons,  
998 3 independent experiments; bleached =  $2.22 \pm 0.348$ ,  $n = 21$  axons, 3 independent experiments,  
999  $p=0.0077$ ).

1000 Scale bars:  $10\mu\text{m}$ . Error bars represent SEM. Unpaired T-test was used to evaluate statistical  
1001 significance.

1002

1003 **Figure 4** – *Syp-SN mediated ROS production increases autophagic vacuoles (AVs) in presynaptic*  
1004 *terminals.*

1005 (A and B) Example EM micrographs of organelles quantified as autophagic vacuoles (AVs) (A) or  
1006 multivesicular bodies (MVBs) (B).

1007 (C and F) Representative EM micrographs of bleached or unbleached synapses 10 (C) or 40 (F) min  
1008 after photobleaching. Arrowheads indicate double membraned AVs. Note, # of AVs but not MVBs is  
1009 significantly increased 10 min following Syp-SN mediated ROS production.

1010 (D and E) Quantification of the number of AVs (D) or MVBs (E) per terminal 10 min after  
1011 photobleaching (D: unbleached =  $0.05 \pm 0.018$ ,  $n = 228$  synapses, 1 independent experiments;  
1012 bleached =  $0.17 \pm 0.044$ ,  $n = 198$  synapses, 2 independent experiments,  $p=0.0062$ ) (E: unbleached =  
1013  $0.04 \pm 0.013$ ,  $n = 228$  synapses, 2 independent experiments; bleached =  $0.05 \pm 0.016$ ,  $n = 198$  synapses,  
1014 2 independent experiments).

1015 (G and H) Quantification of the number of AVs (G) or MVBs (H) per terminal 40 min after  
1016 photobleaching (G: unbleached =  $0.04 \pm 0.016$ ,  $n = 138$  synapses, 2 independent experiments;  
1017 bleached =  $0.09 \pm 0.028$ ,  $n = 215$  synapses, 2 independent experiments) (H: unbleached =  $0.05 \pm 0.019$ ,

1018 n = 138 synapses, 2 independent experiments; bleached =  $0.05 \pm 0.014$ , n = 215 synapses, 2  
1019 independent experiments).

1020 Scale bars: 300nm (C and F), 200nm (A and B). Error bars represent SEM. Unpaired T-test was used to  
1021 evaluate statistical significance.

1022

1023 **Figure 5 – Syp-SN mediated ROS production increases eGFP-Rab7 and Chmp2b levels at presynaptic**  
1024 *boutons*.

1025 (A) Schematic of FU-Syp-Supernova-P2A-eGFP-Rab7 expression vector.

1026 (B, C and D) Images of hippocampal axons/synapses expressing FU-Syp-Supernova-P2A-eGFP-Rab7  
1027 that were fixed and stained with antibodies against GFP, Supernova and Chmp2b, 5 min, 1 hour and 2  
1028 hours after Syp-SN mediated ROS production.

1029 (E, G and I) Quantification of the normalized eGFP-Rab7 intensity in Syp-SN puncta 5 min, 1 hour or 2  
1030 hours after photobleaching of Syp-SN (E: unbleached =  $1 \pm 0.052$ , n = 249 synapses, 4 independent  
1031 experiments; bleached =  $1.24 \pm 0.066$ , n = 314 synapses, 4 independent experiments, p=0.0063) (G:  
1032 unbleached =  $1 \pm 0.050$ , n = 280 synapses, 4 independent experiments; bleached =  $1.16 \pm 0.053$ , n =  
1033 373 synapses, 4 independent experiments, p=0.0376) (I: unbleached =  $1 \pm 0.046$ , n = 258 synapses, 4  
1034 independent experiments; bleached =  $1.40 \pm 0.083$ , n = 352 synapses, 4 independent experiments,  
1035 p=0.0001). Note, Rab7 levels are significantly increased at all three times.

1036 (F, H and J) Quantification of the normalized Chmp2b intensity in Syp-SN puncta 5 min, 1 hour or 2  
1037 hours after photobleaching of Syp-SN. Levels are significantly increased at 1 hour but not 5 min or 2  
1038 hours after ROS mediated damage. (F: unbleached =  $1 \pm 0.089$ , n = 67 synapses, 2 independent  
1039 experiments; bleached =  $1.44 \pm 0.219$ , n = 71 synapses, 2 independent experiments) (H: unbleached =  
1040  $1 \pm 0.080$ , n = 91 synapses, 2 independent experiments; bleached =  $1.45 \pm 0.174$ , n = 89 synapses, 2  
1041 independent experiments, p=0.0196) (J: unbleached =  $1 \pm 0.074$ , n = 108 synapses, 2 independent  
1042 experiments; bleached =  $1.23 \pm 0.134$ , n = 118 synapses, 2 independent experiments).

1043 Scale bars: 10 $\mu$ m. Error bars represent SEM. Unpaired T-test was used to evaluate statistical  
1044 significance.

1045

1046 **Figure 6 – *Syt-SN* and *Syn-SN* mediated ROS production increases eGFP-LC3 levels at presynaptic**  
1047 *boutons.*

1048 (A) Schematic of a SV containing Synaptophysin, Synaptotagmin or Synapsin tagged with Supernova.  
1049 Note, the short (95aa) vs. long (346aa) cytoplasmic tails of Synaptophysin vs. Synaptotagmin,  
1050 respectively, which could significantly change the distance of Supernova to the SV membrane.  
1051 Similarly, tagging Supernova to the much larger peripherally associated SV protein Synapsin could also  
1052 affect its distance to the SV membrane. Moreover, as the association of Synapsin with SVs is  
1053 dynamically regulated, activity can be used to disassociate it from SVs.

1054 (B, C and D) Images of hippocampal synapses expressing FU-Syt-Supernova-P2A-eGFP-LC3 that were  
1055 fixed and stained with antibodies against GFP and Supernova 5 min (B), 1 hour (C) and 2 hours (D)  
1056 after bleaching. Note, eGFP-LC3 levels are significantly increased 1 hour after Syt-SN mediated ROS  
1057 production.

1058 (E, F and G) Quantification of normalized eGFP-LC3 intensities within Syt-SN puncta, 5 min (E), 1 hour  
1059 (F) and 2 hours (G) after bleaching. (E: unbleached =  $1 \pm 0.074$ , n = 62 synapses, 2 independent  
1060 experiments; bleached =  $1.06 \pm 0.098$ , n = 76 synapses, 2 independent experiments) (F: unbleached =  
1061  $1 \pm 0.111$ , n = 73 synapses, 2 independent experiments; bleached =  $1.45 \pm 0.143$ , n = 81 synapses, 2  
1062 independent experiments, p=0.0156) (G: unbleached =  $1 \pm 0.085$ , n = 58 synapses, 2 independent  
1063 experiments; bleached =  $1.05 \pm 0.087$ , n = 68 synapses, 2 independent experiments).

1064 (H, I and J) Images of hippocampal synapses expressing FU-Syn-Supernova-P2A-eGFP-LC3 that were  
1065 fixed and stained with antibodies against GFP and Supernova 5 min (H), 1 hour (I) and 2 hours (J) after  
1066 bleaching. Note, eGFP-LC3 levels are significantly increased 1 hour and 2 hours after Syn-SN mediated  
1067 ROS production.

1068 (K, L and M) Quantification of normalized eGFP-LC3 intensities within Syp-SN puncta, 5 min (K), 1  
1069 hour (L) and 2 hours (M) after bleaching. (K: unbleached =  $1 \pm 0.084$ , n = 58 synapses, 3 independent  
1070 experiments; bleached =  $1.04 \pm 0.069$ , n = 81 synapses, 3 independent experiments) (L: unbleached =  
1071  $1 \pm 0.061$ , n = 77 synapses, 3 independent experiments; bleached =  $1.72 \pm 0.103$ , n = 103 synapses, 3  
1072 independent experiments, p<0.0001) (M: unbleached =  $1 \pm 0.075$ , n = 42 synapses, 3 independent  
1073 experiments; bleached =  $1.30 \pm 0.090$ , n = 71 synapses, 3 independent experiments, p=0.0255).

1074 Scale bars: 10 $\mu$ m. Error bars represent SEM. Unpaired T-test was used to evaluate statistical  
1075 significance.

1076

1077 **Figure 7** – *Synapsin dispersion blocks ROS induced increase in eGFP-LC3 levels in axons and boutons*  
1078 *expressing Syn-SN.*

1079 (A and B) Images of hippocampal synapses expressing FU-Syn-Supernova-P2A-eGFP-LC3 that were  
1080 fixed and stained with antibodies against GFP and Supernova 1 hour after bleaching in the absence (A)  
1081 or presence of 60mM KCl (B) to increase synaptic activity and induce the dispersion of Syn-SN.

1082 (C - F) Quantification of normalized eGFP-LC3 intensities within Syp-SN puncta (C and E) or the  
1083 normalized number of eGFP-LC3 puncta per unit axon length (D and F) 1 hour after photobleaching of  
1084 Syn-SN in the absence (C and D) or presence of 60mM KCl (E and F). Note that increased activity to  
1085 disperse Syn-SN blocks ROS induced increase in axonal and synaptic eGFP-LC3 (C: unbleached =  $1 \pm$   
1086  $0.047$ , n = 240 synapses, 3 independent experiments; bleached =  $1.47 \pm 0.061$ , n = 330 synapses, 3  
1087 independent experiments,  $p < 0.0001$ ) (D: unbleached =  $1 \pm 0.150$ , n = 26 axons, 3 independent  
1088 experiments; bleached =  $1.53 \pm 0.135$ , n = 27 axons, 3 independent experiments,  $p = 0.0117$ ) (E:  
1089 unbleached =  $1 \pm 0.054$ , n = 116 synapses, 3 independent experiments; bleached =  $0.94 \pm 0.057$ , n =  
1090 108 synapses, 3 independent experiments) (F: unbleached =  $1 \pm 0.123$ , n = 19 axons, 3 independent  
1091 experiments; bleached =  $1.02 \pm 0.126$ , n = 19 axons, 3 independent experiments).

1092 Scale bars: 10 $\mu$ m. Error bars represent SEM. Unpaired T-test was used to evaluate statistical  
1093 significance.

1094

1095 **Figure 8** – *ROS damaged SV proteins selectively accumulate in autophagy organelles.*

1096 (A and B) Images of hippocampal neurons expressing Supernova-tagged synaptic proteins Syp-SN (A)  
1097 or Syt-SN (B) that were fixed 1 hour after bleaching and stained with antibodies against GFP,  
1098 Supernova, Bassoon and Synaptotagmin1 (Syt1) (A) or Synaptophysin1 (Syp1) (B).

1099 (C) Images of hippocampal neurons expressing eGFP-LC3 only were fixed untreated (basal autophagy)  
1100 and stained with antibodies against GFP, Bassoon and Synaptophysin1, (Syp1) or Synapsin1 (Syn1), or  
1101 Synaptotagmin1 (Syt1).

1102 (D) Quantification of the fraction of extrasynaptic eGFP-LC3 puncta positive for SN-tagged  
1103 Synaptophysin, indicated by arrowheads in (A), or endogenous Syt1 within the same experiment (Syp-  
1104 SN =  $0.71 \pm 0.075$ , n = 38 puncta, 3 independent experiments; Syt1 =  $0.18 \pm 0.064$ , n = 38 puncta, 3  
1105 independent experiments,  $p < 0.0001$ ). Also quantified is the fraction of extrasynaptic Syp-SN puncta  
1106 that are positive for eGFP-LC3 ( $0.43 \pm 0.060$ , n = 68 puncta, 3 independent experiments).

1107 (E) Quantification of the fraction of extrasynaptic eGFP-LC3 puncta positive for SN-tagged  
1108 Synaptotagmin, indicated by arrowheads (B), or endogenous Syp1 within the same experiment (Syt-  
1109 SN =  $0.70 \pm 0.081$ , n = 33 puncta, 2 independent experiments; Syp1 =  $0.18 \pm 0.068$ , n = 33 puncta, 2  
1110 independent experiments,  $p < 0.0001$ ). Also quantified is the fraction of extrasynaptic Syt-SN puncta  
1111 that are positive for eGFP-LC3 ( $0.43 \pm 0.068$ , n = 54 puncta, 2 independent experiments).

1112 (F) Quantification of the fraction of extrasynaptic eGFP-LC3 puncta also positive for endogenous  
1113 Synaptophysin1, Synapsin1 or Synaptotagmin1. Note, the fraction of extrasynaptic eGFP-LC3 puncta  
1114 positive for Synaptophysin1 is significantly higher than the fraction positive for Synapsin1 (Syp1 basal  
1115 =  $0.40 \pm 0.051$ , n = 93 puncta, 2 independent experiments; Syn1 basal =  $0.14 \pm 0.038$ , n = 85 puncta, 2  
1116 independent experiments; Syt1 basal =  $0.28 \pm 0.050$ , n = 81 puncta, 2 independent experiments).

1117 Scale bars: 10 $\mu$ m. Error bars represent SEM. Unpaired T-test (D and E) and ANOVA Tukey's multiple  
1118 comparisons test (F) was used to evaluate statistical significance.

1119

1120 **Figure 9** – ROS induced damage to Syp-SN impairs FM 1-43 uptake only when autophagy is inhibited.

1121 (A, B, F, G) Images of hippocampal neurons expressing FU-Syp-Supernova-P2A-eGFP-LC3 (A and B) or  
1122 FU-Syn-Supernova-P2A-eGFP-LC3 (F and G), loaded with FM 1-43 for 90 sec in 90mM KCl, 5 min after  
1123 photobleaching in the absence (A and F) or presence of 1 $\mu$ M wortmannin (B and G). Note, Syp-SN and  
1124 Syn-SN images were taken before bleaching.

1125 (C) Correlation of FM 1-43 intensity over Syp-SN intensity of (A) and (B) (n = 238 (unbleached), 221  
1126 (bleached), 221 (1 $\mu$ M W unbleached), 147 (1 $\mu$ M W bleached) synapses, 4 independent experiments).

1127 (D and E) Quantification of the slope of the linear regression between bleached and unbleached  
1128 synapses either in the absence (D: unbleached =  $5.59 \pm 1.272$ , 4 independent experiments; bleached =  
1129  $4.27 \pm 1.007$ , 4 independent experiments) or presence of wortmannin (E: unbleached =  $4.43 \pm 1.126$ , 4

1130 independent experiments; bleached =  $1.26 \pm 0.235$ , 4 independent experiments,  $p=0.0332$ ). Note, in  
1131 the presence of wortmannin, the slope of the linear regression is significantly reduced in bleached  
1132 synapses compared to unbleached synapses (E).

1133 (H) Correlation of FM 1-43 intensity over Syn-SN intensity of (F) and (G) ( $n = 69$  (unbleached), 64  
1134 (bleached), 80 ( $1\mu\text{M W}$  unbleached), 88 ( $1\mu\text{M W}$  bleached) synapses, 3 independent experiments).

1135 (I and J) Quantification of the slope of the linear regression between bleached and unbleached  
1136 synapses either in the absence (I: unbleached =  $7.16 \pm 1.762$ , 3 independent experiments; bleached =  
1137  $5.47 \pm 0.986$ , 3 independent experiments) or presence of wortmannin (J: unbleached =  $4.18 \pm 2.674$ , 3  
1138 independent experiments; bleached =  $5.94 \pm 0.900$ , 3 independent experiments). Note, wortmannin  
1139 does not affect the uptake of FM 1-43 dye following ROS mediated damage to Syn-SN.

1140 Scale bars:  $10\mu\text{m}$ . Error bars represent SEM. Unpaired T-test was used to evaluate statistical  
1141 significance.

1142

1143 **Figure 10** – ROS induced damage to Syp-SN impairs evoked release only when autophagy is inhibited.

1144 (A, B and C) Example traces of whole-cell patch recording of evoked EPSCs from autaptic hippocampal  
1145 neurons expressing FU-Syp-Supernova-P2A-eGFP-LC3 before and 5 min after ROS induced damage to  
1146 Syp-SN either in the absence (A) or presence of  $1\mu\text{M}$  wortmannin (C). Neurons treated with  
1147 wortmannin but were not bleached served as a control (B). (A amplitude: before =  $4.25 \pm 1.050$ , after =  
1148  $3.74 \pm 1.134$ , 14 neurons, 3 independent experiments) (B amplitude: before =  $2.07 \pm 0.311$ , after =  $1.85$   
1149  $\pm 0.277$ , 13 neurons, 3 independent experiments) (C amplitude: before =  $2.50 \pm 0.570$ , after =  $1.63 \pm$   
1150  $0.409$ , 16 neurons, 3 independent experiments,  $p=0.0042$ )

1151 (M) Quantification of the percent decrease in EPSC amplitude after photobleaching. Note that the  
1152 decrease in amplitude is significantly higher when  $1\mu\text{M}$  wortmannin is present (bleached =  $14.57 \pm$   
1153  $6.620$ ,  $n = 14$  neurons, 3 independent experiments;  $1\mu\text{M W} = 11.09 \pm 8.479$ ,  $n = 13$  neurons, 3  
1154 independent experiments;  $1\mu\text{M W}$  bleached =  $39.69 \pm 6.869$ ,  $n = 16$  neurons, 3 independent  
1155 experiments,  $p=0.0445$  and  $p=0.0223$ ).

1156 Error bars represent SEM. Paired T-test (A, B and C) and ANOVA Tukey's multiple comparisons test  
1157 (D) was used to evaluate statistical significance.

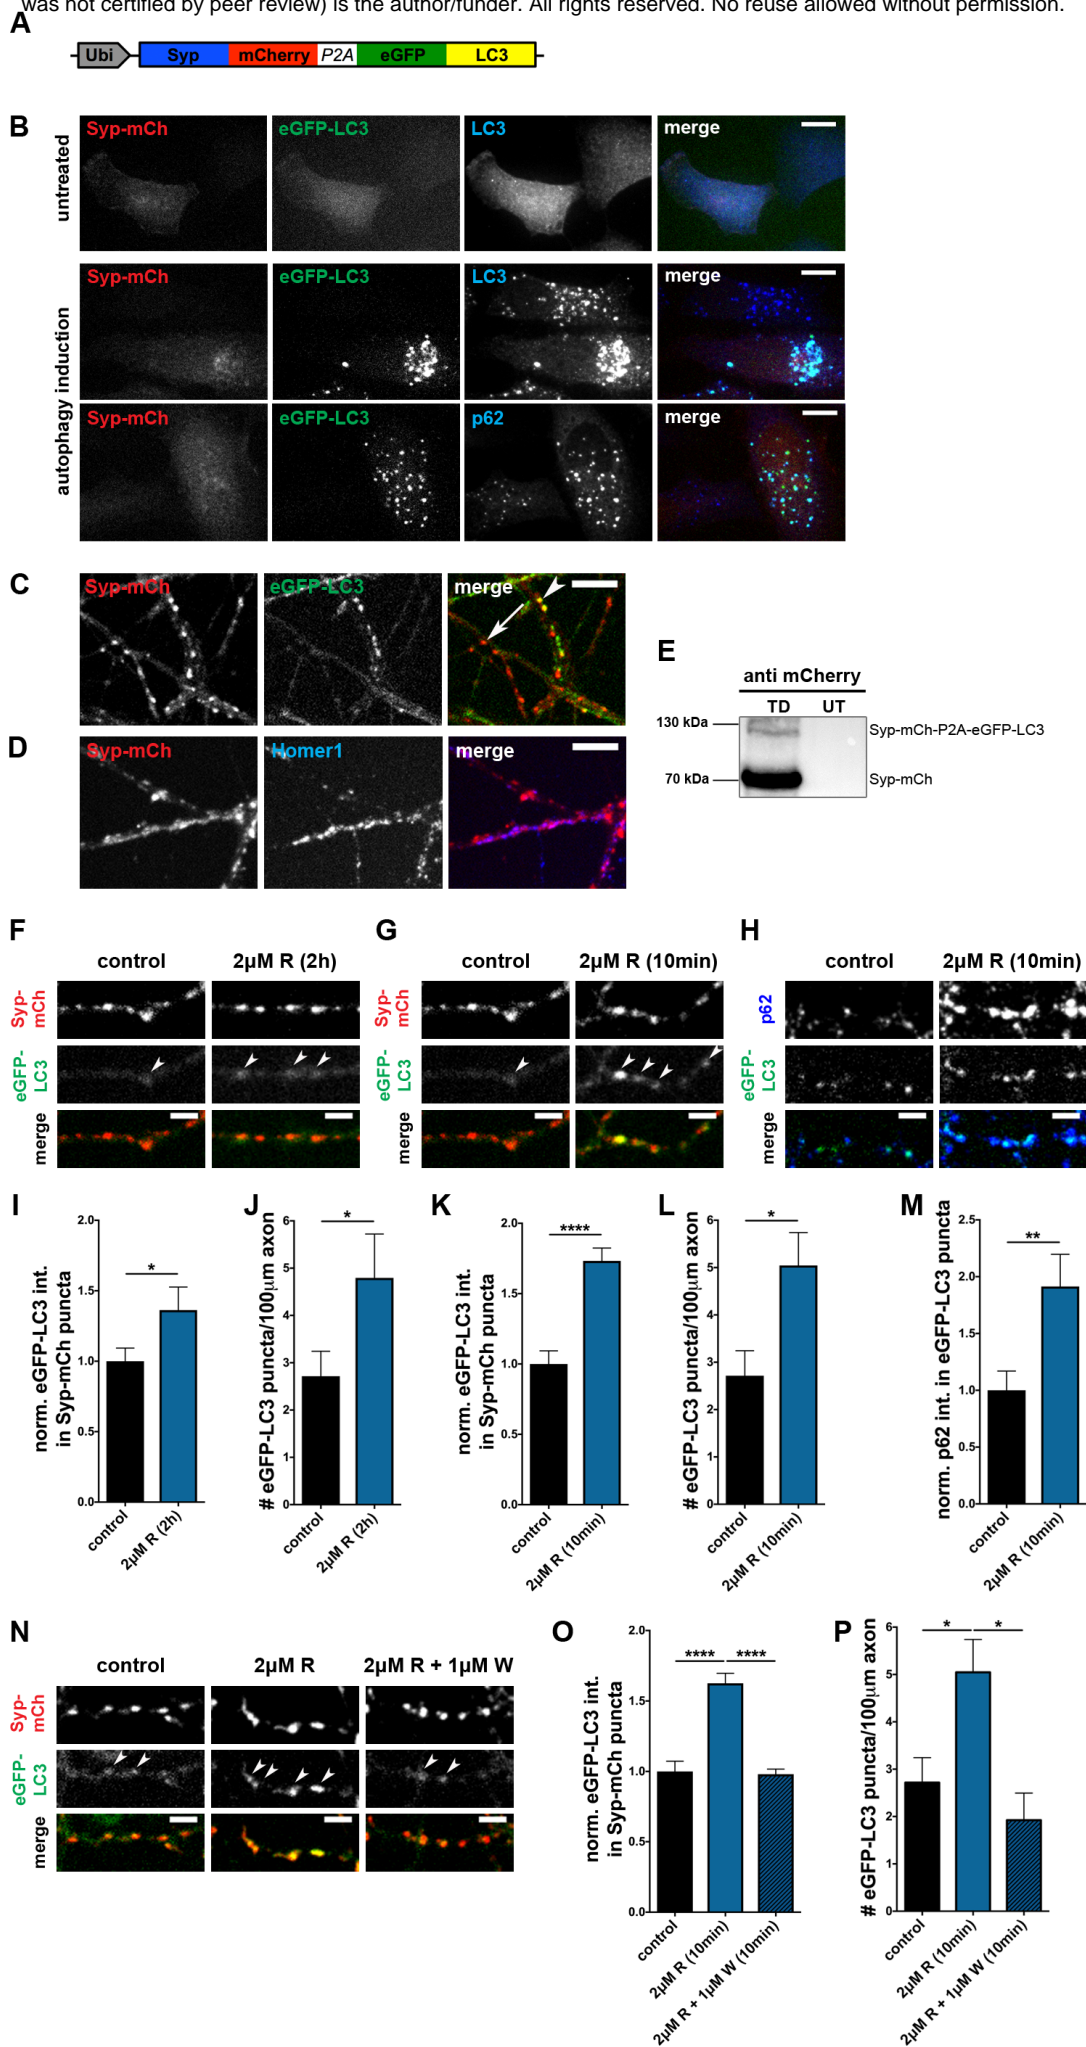

Figure 1



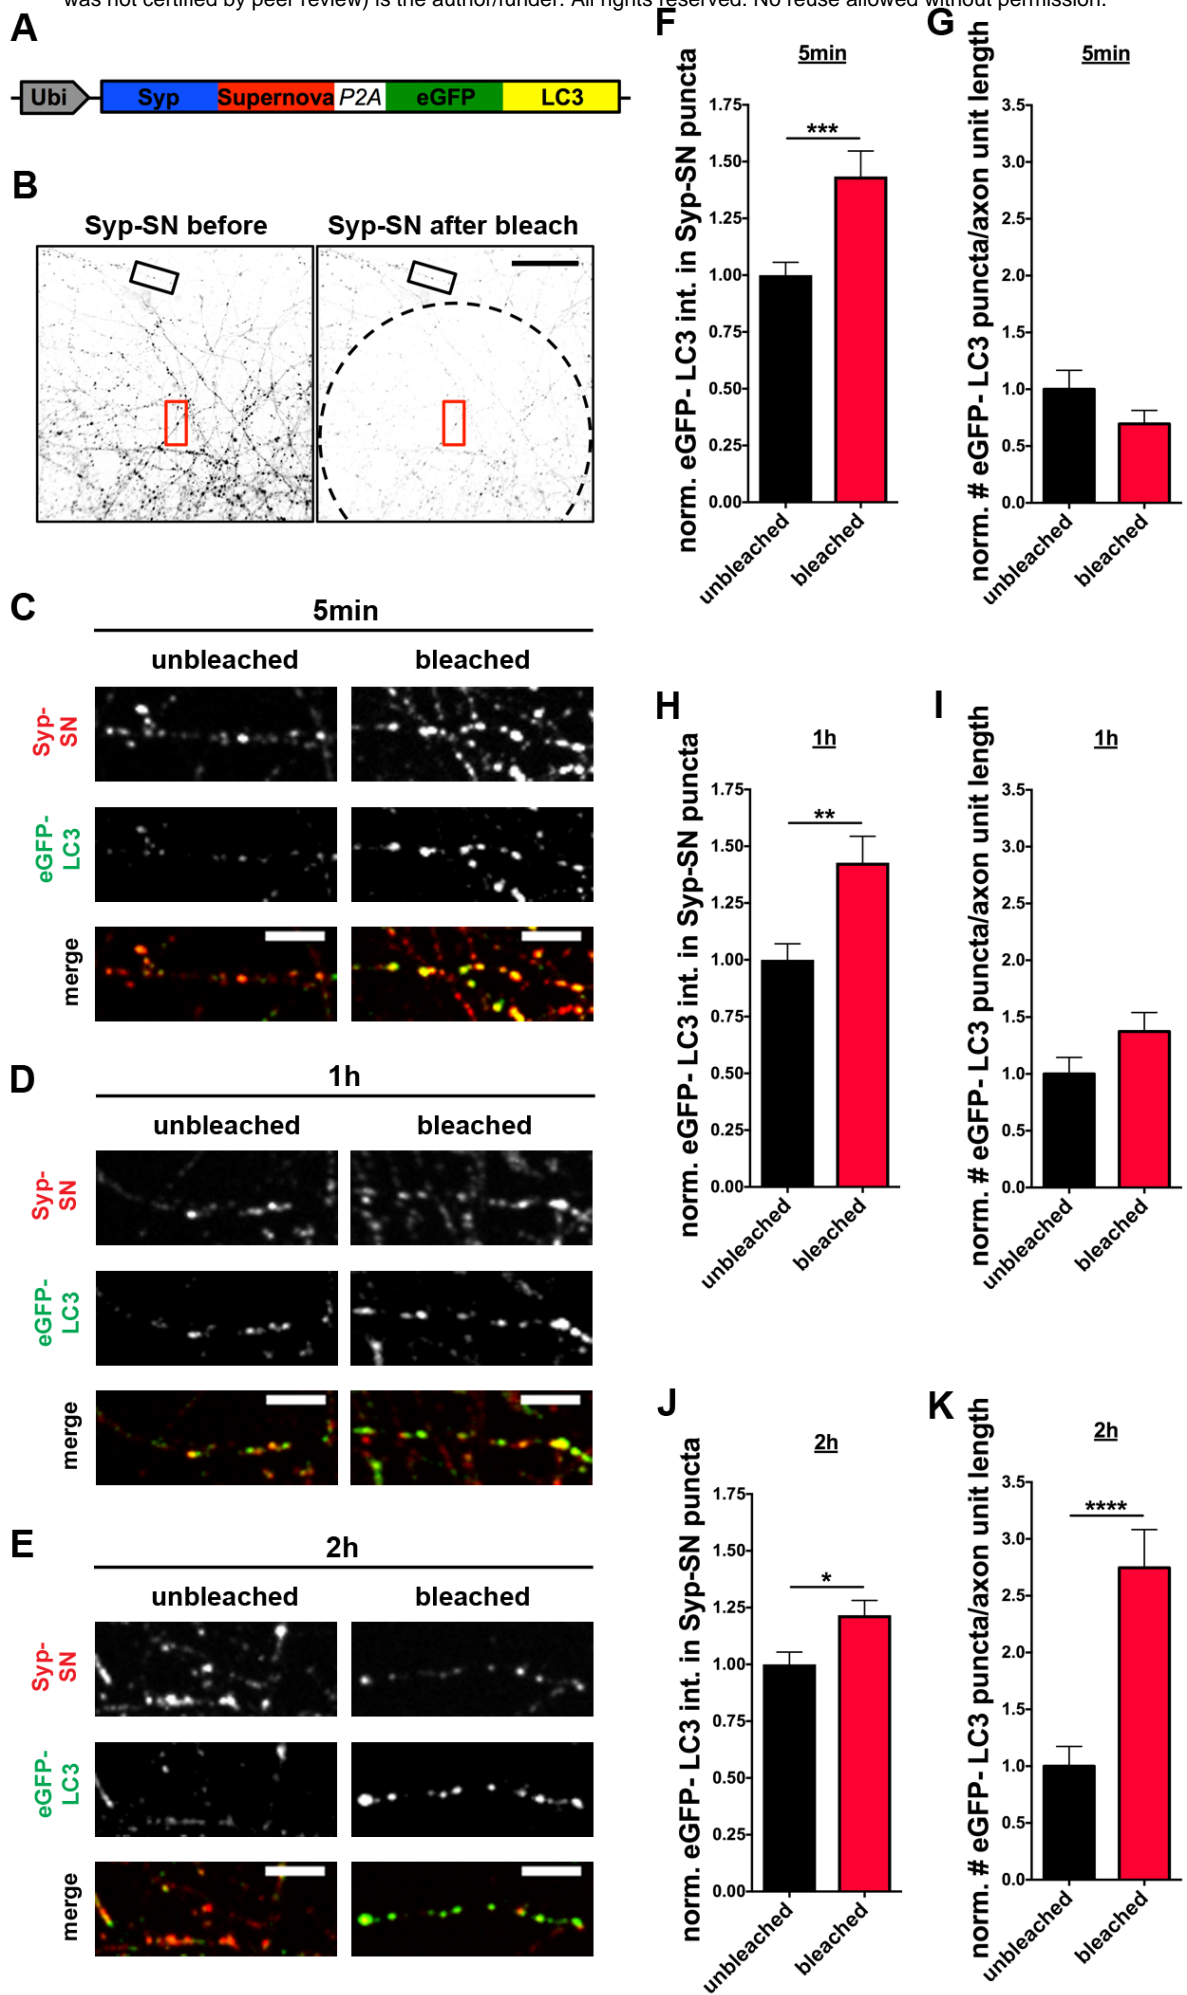

Figure 2

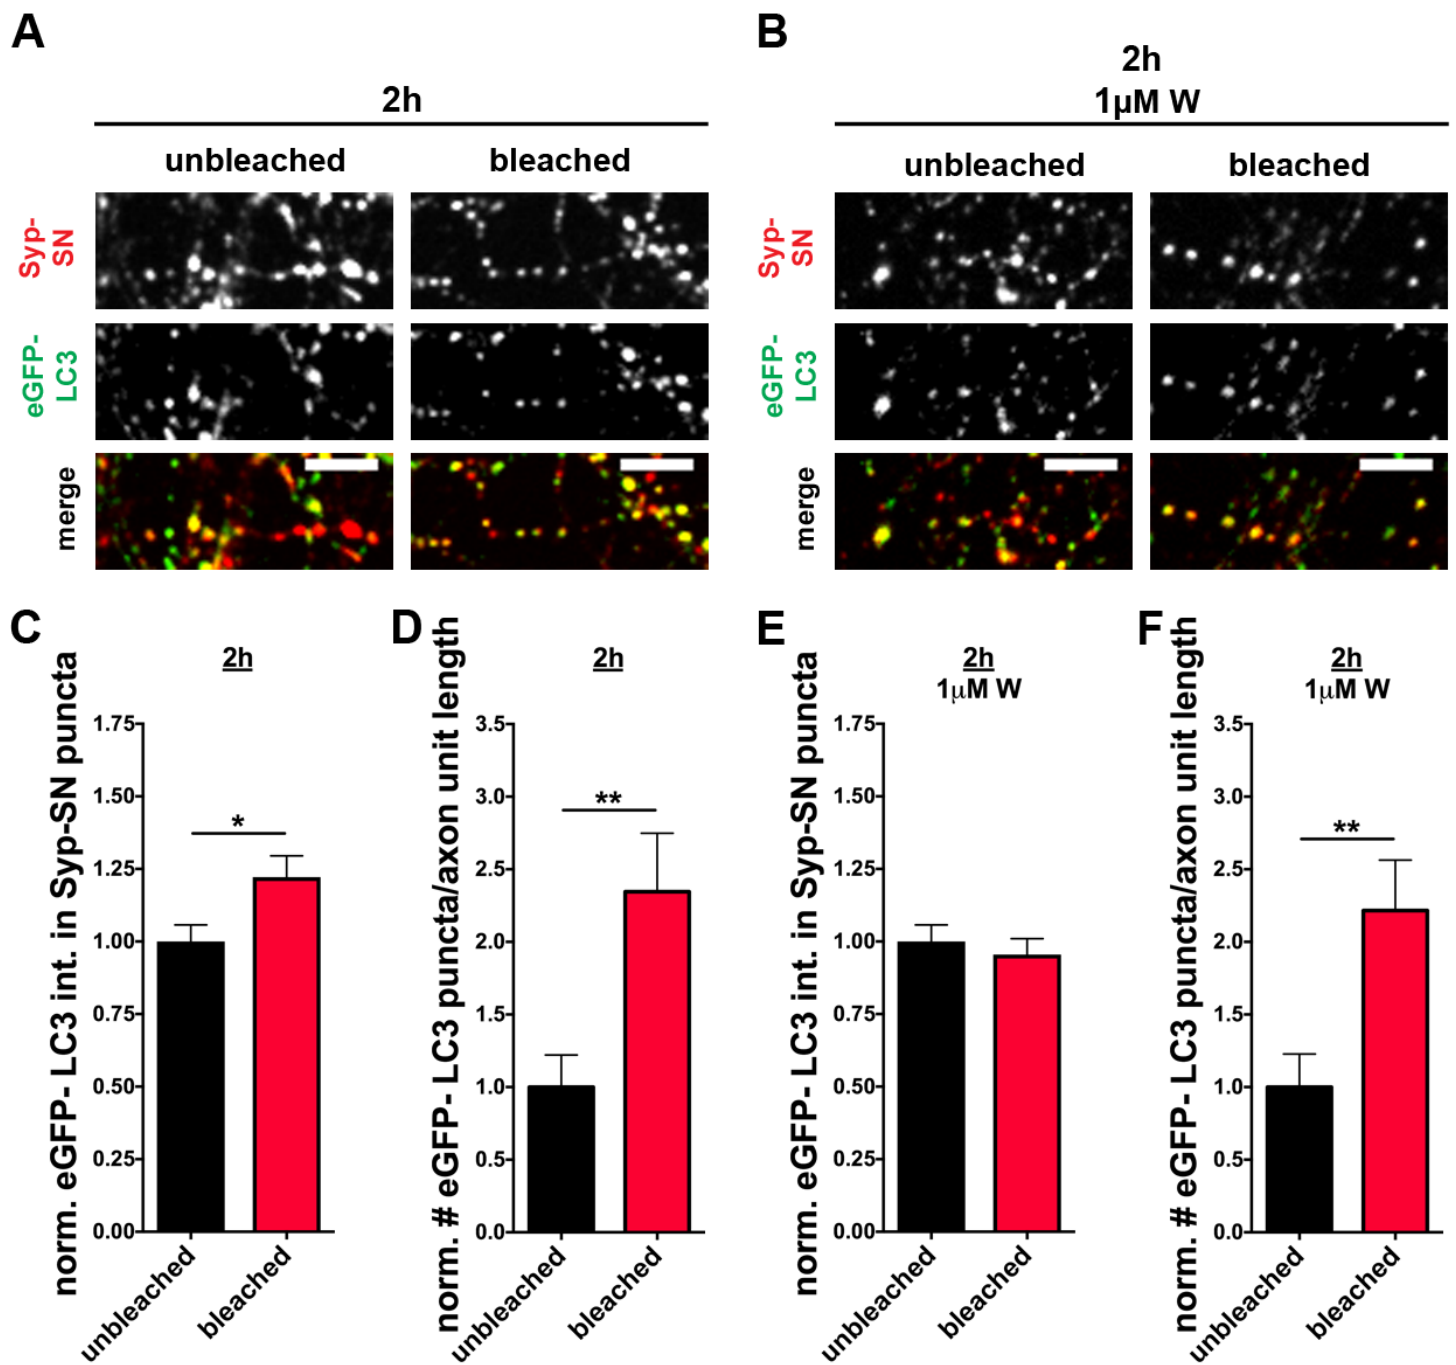

Figure 3

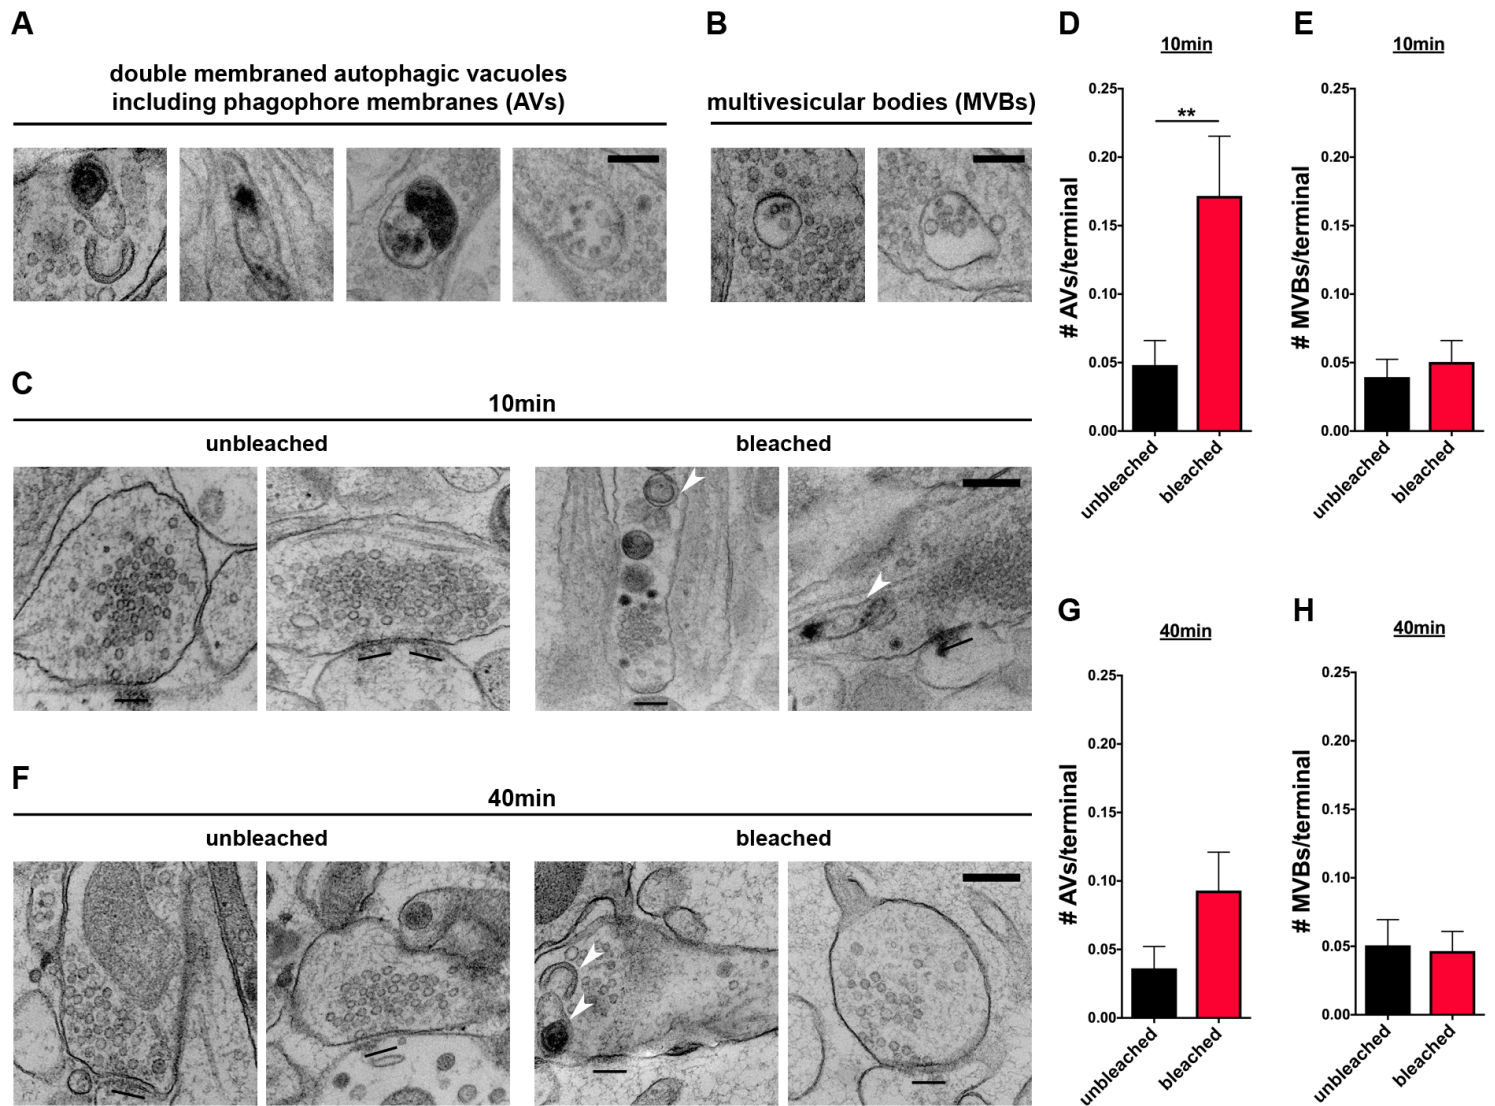

Figure 4

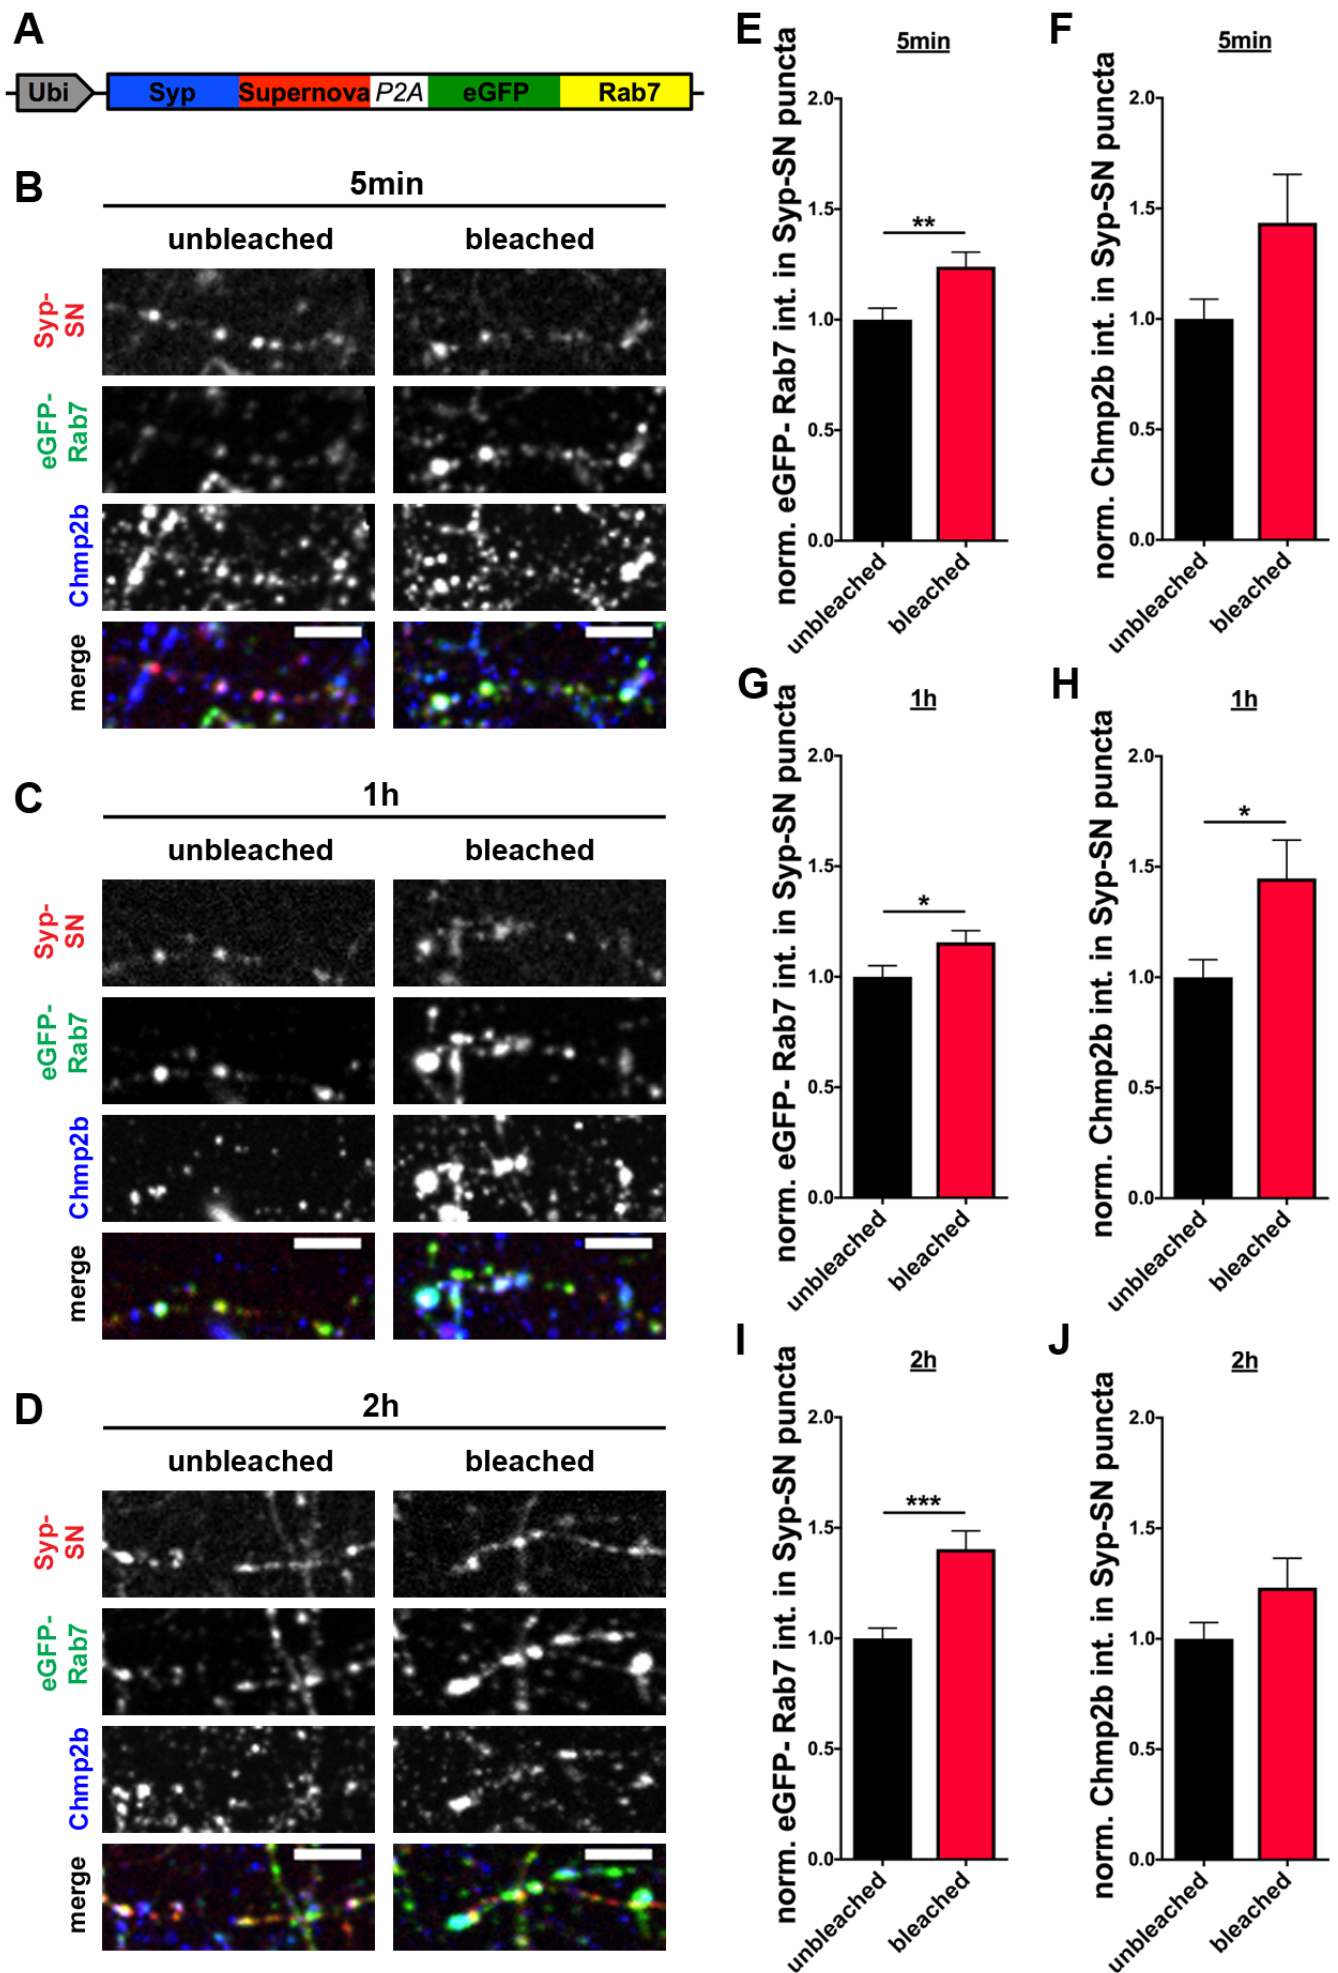

Figure 5

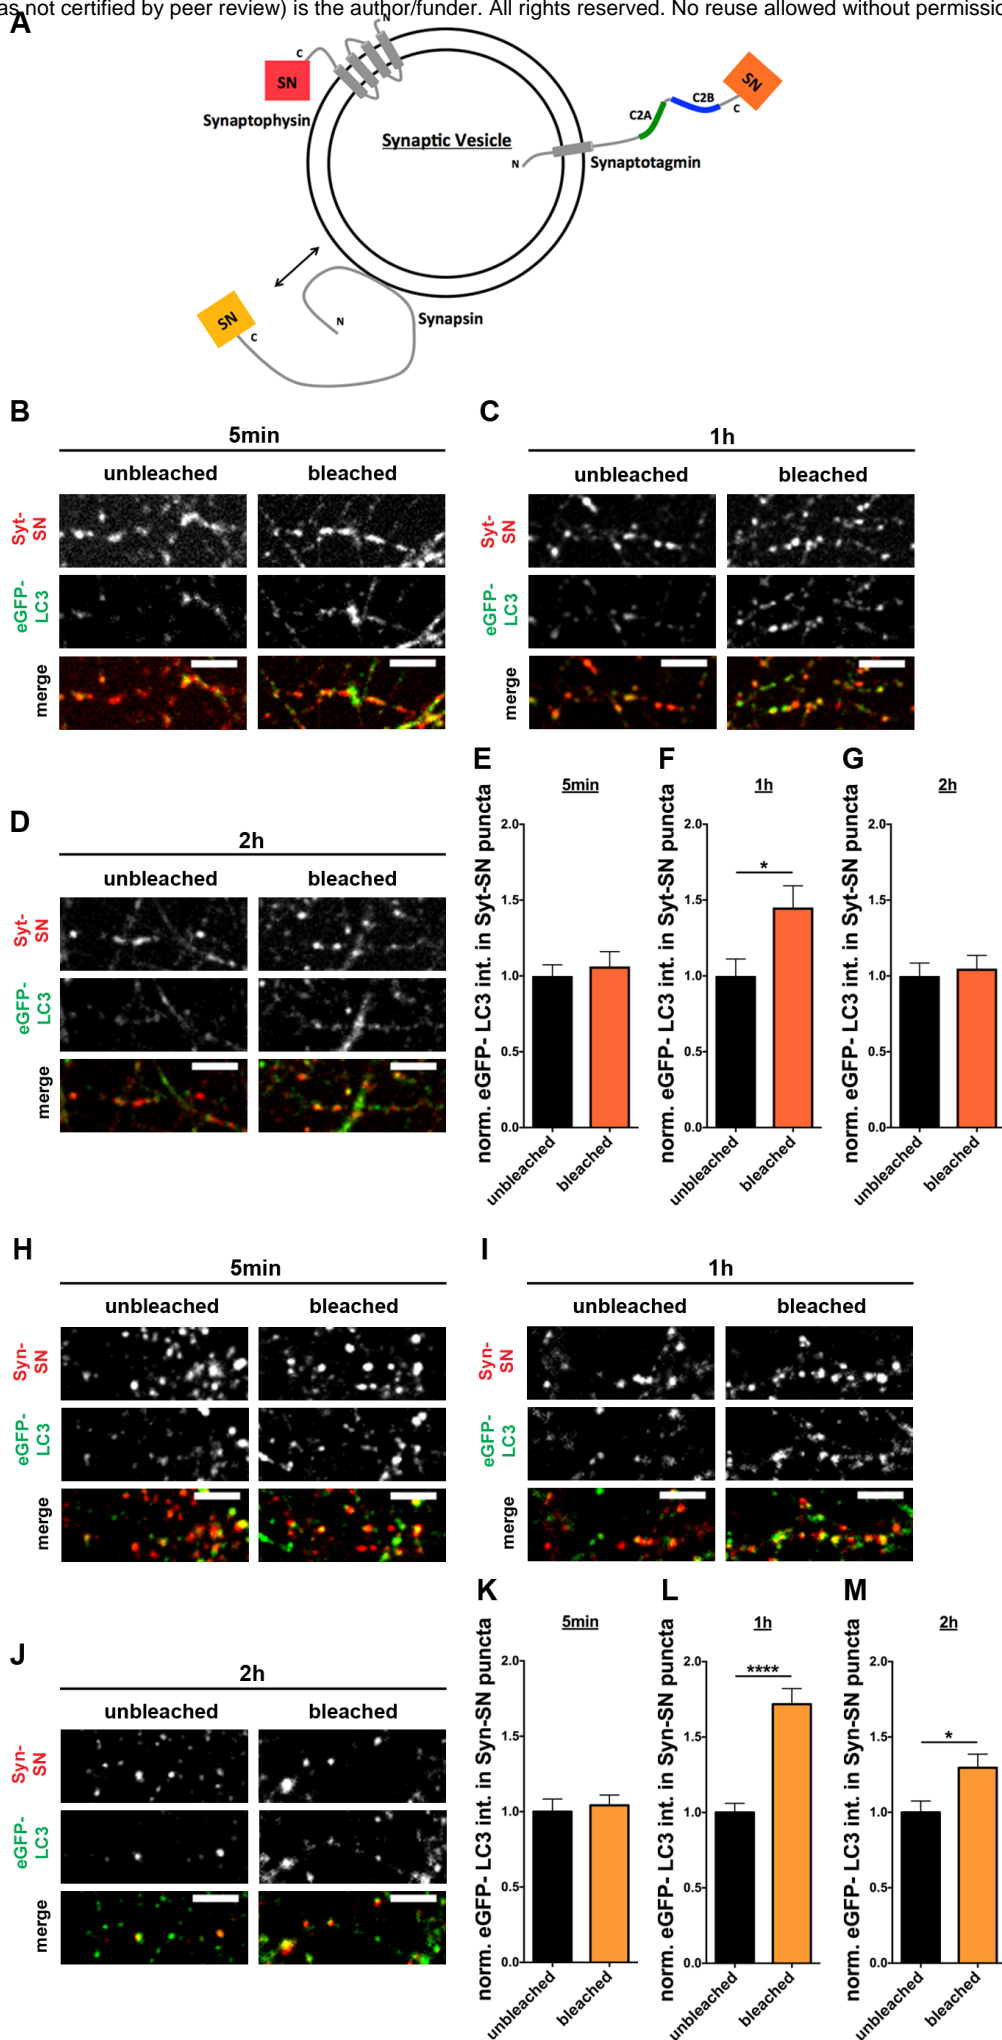

Figure 6

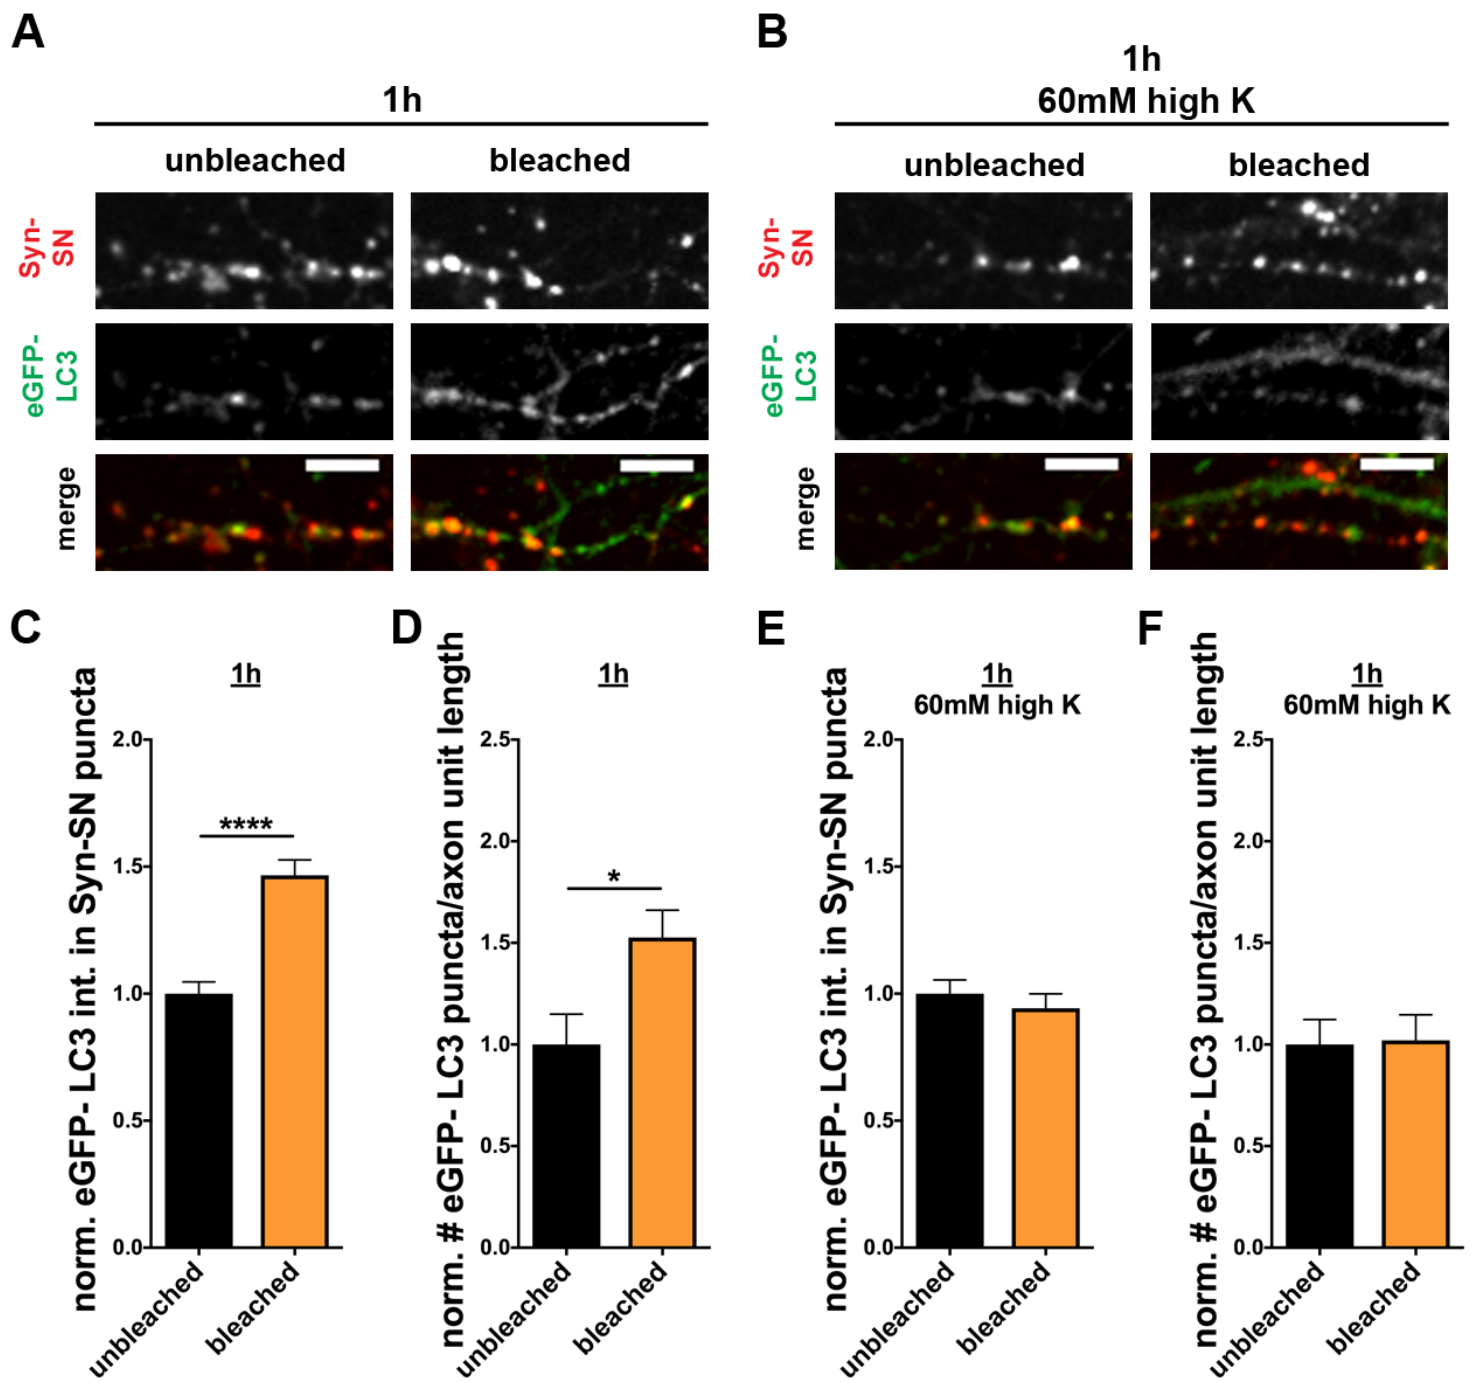

Figure 7

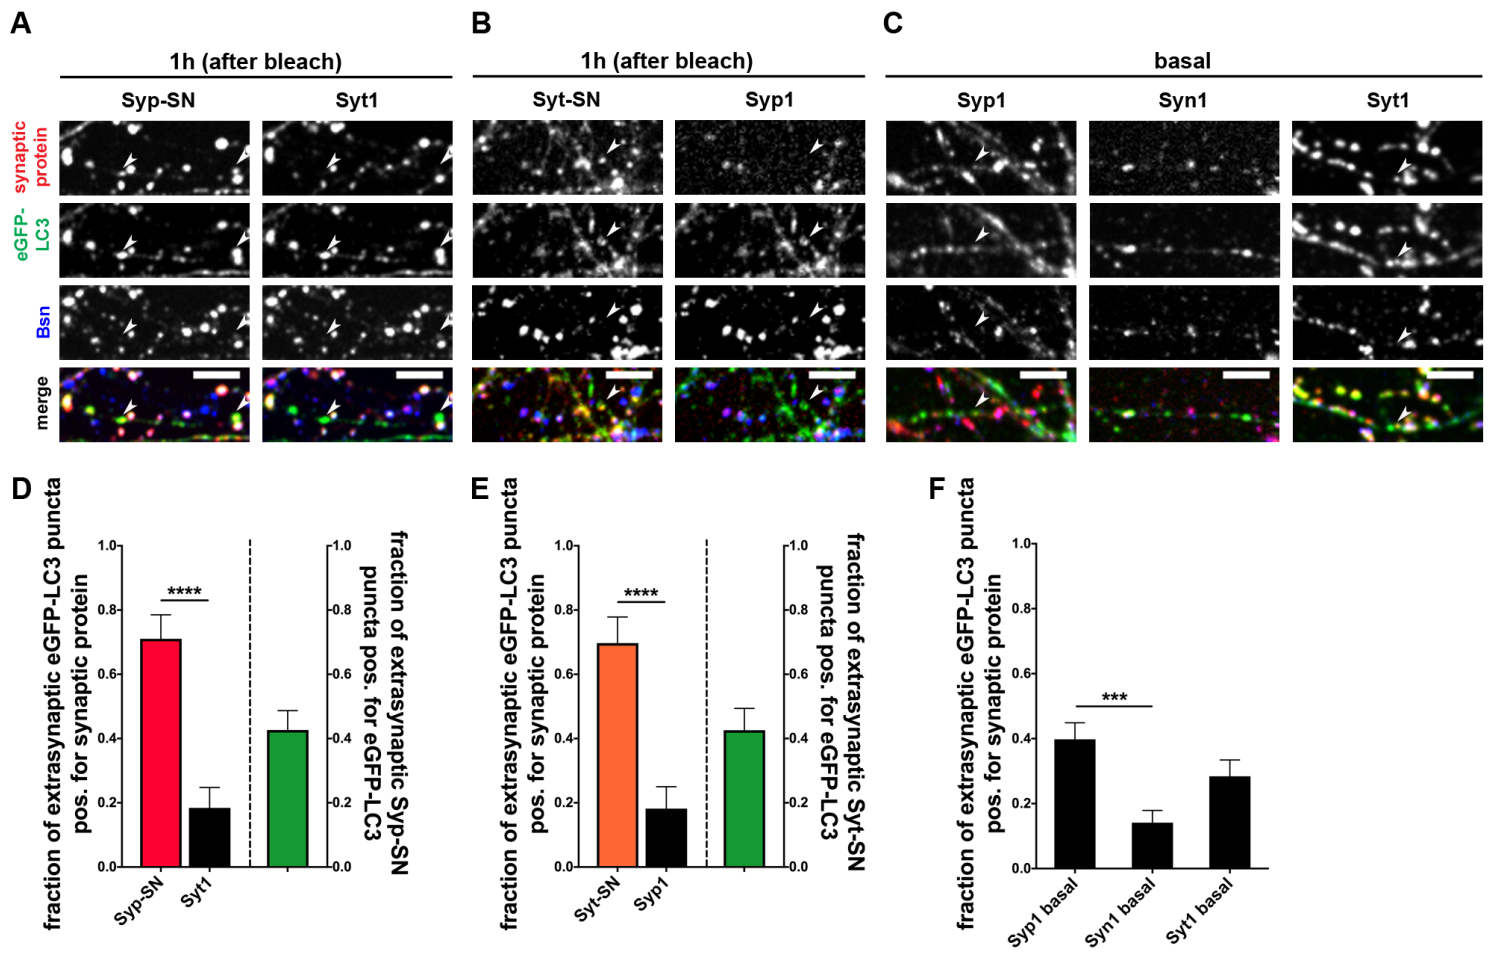

**Figure 8**

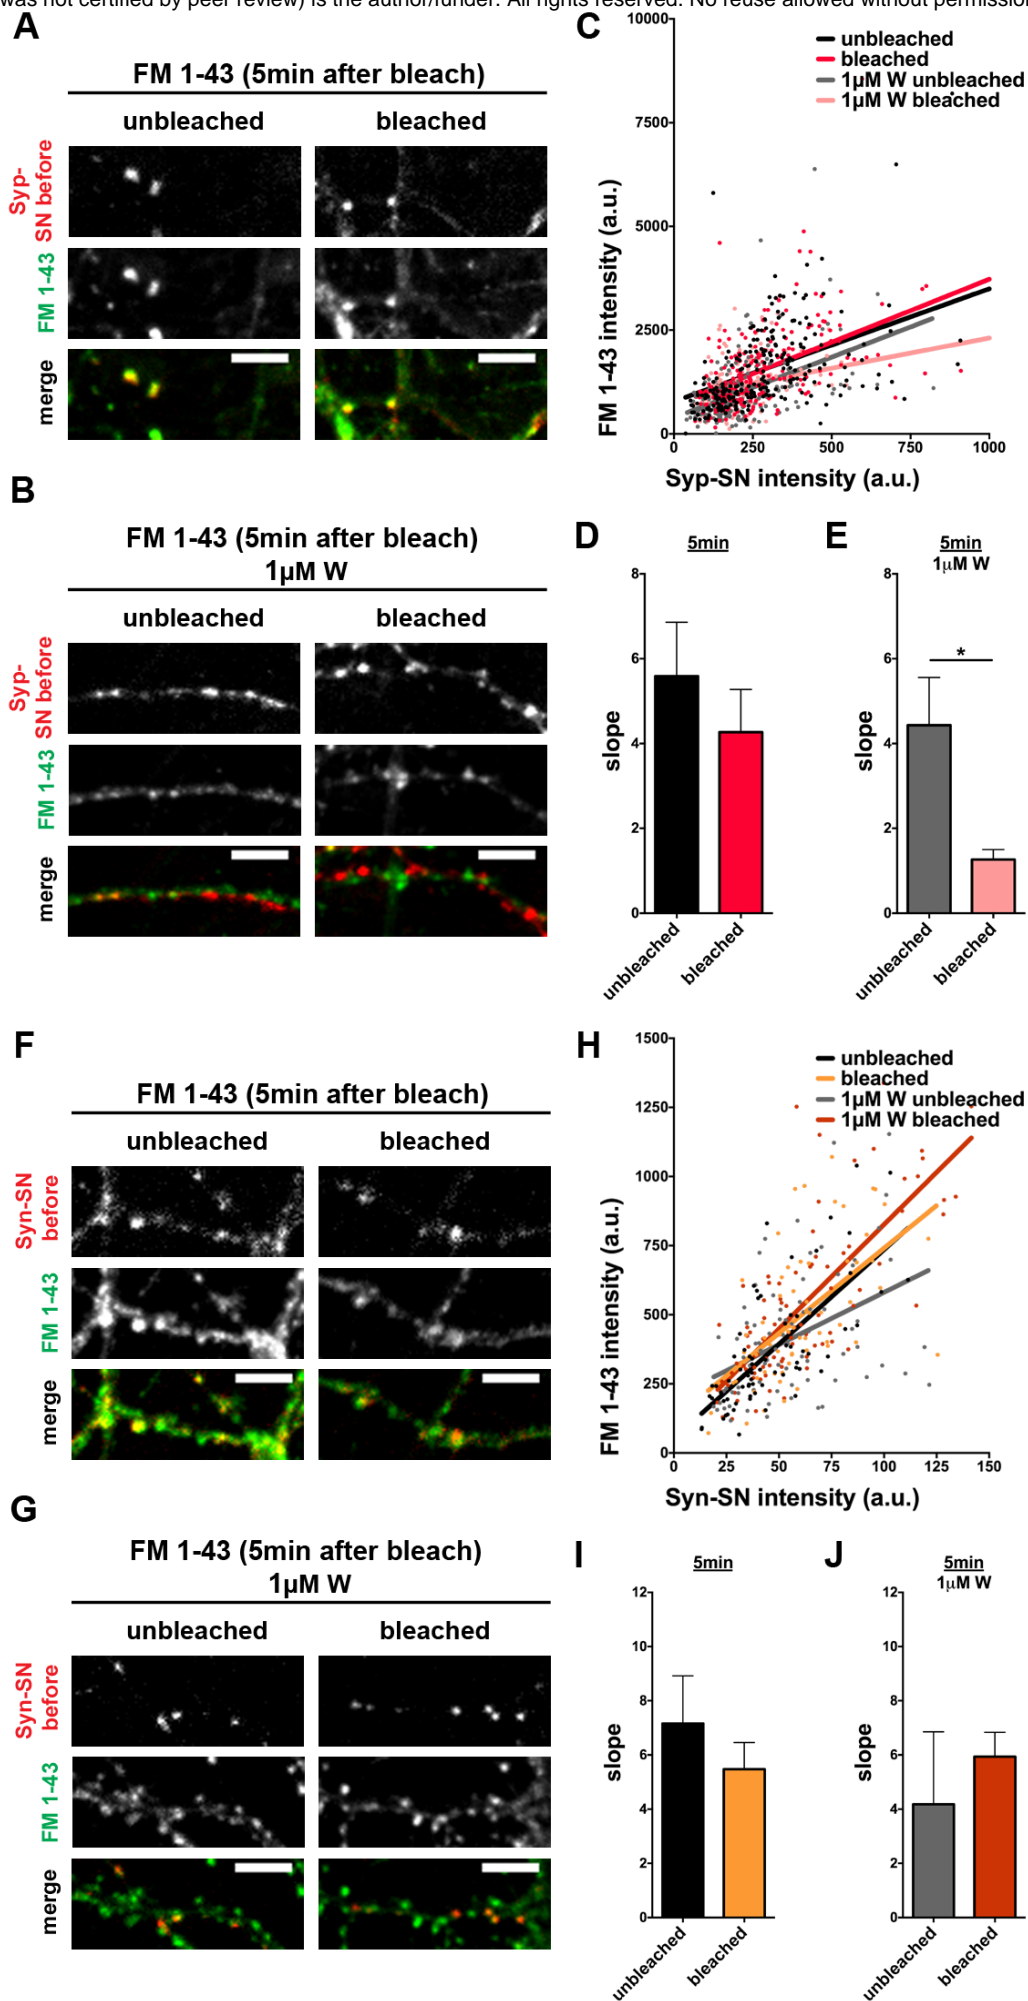

Figure 9



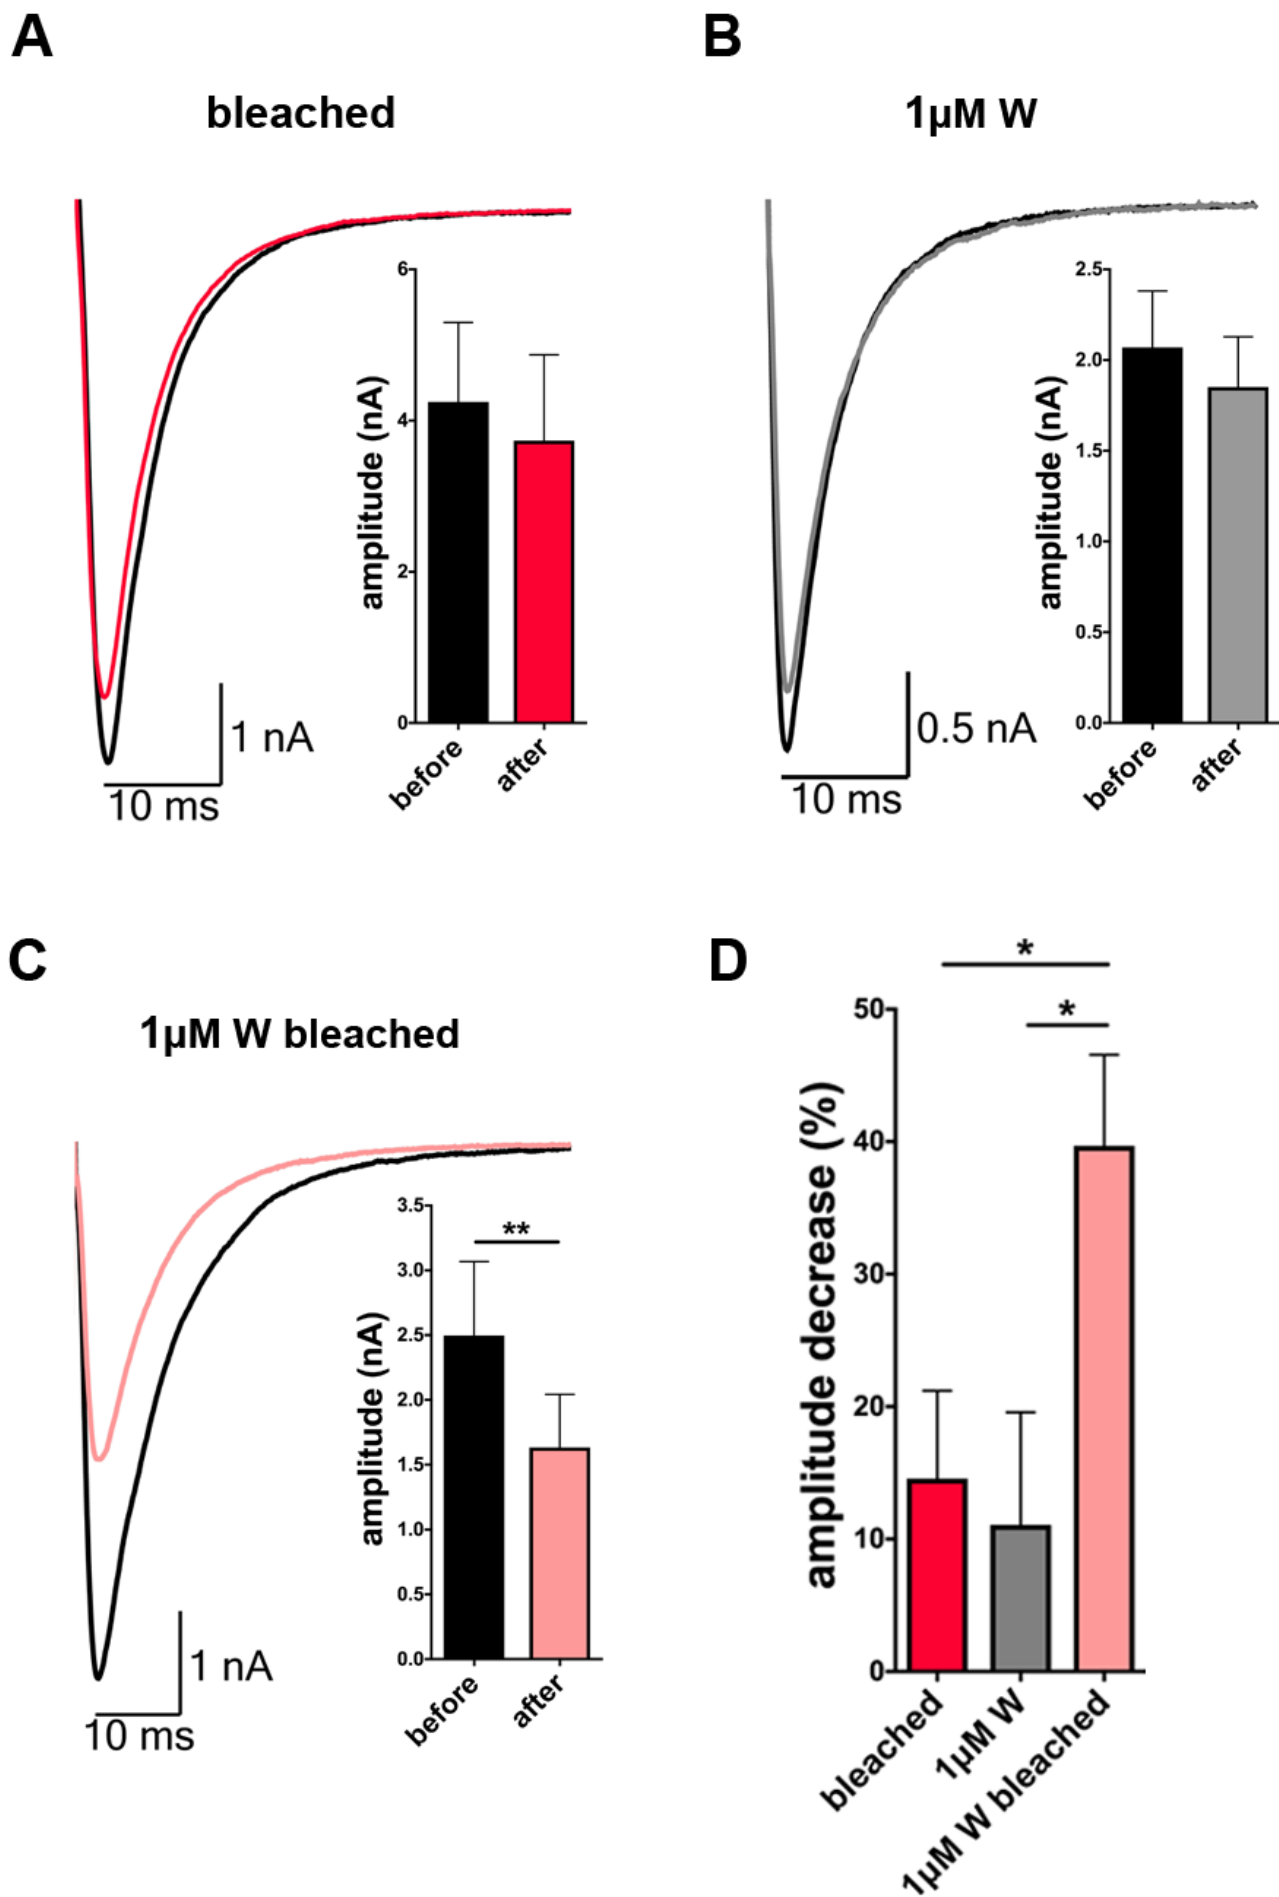

**Figure 10**
